# Supplementary material for: Metabolic Differences between Dogs of Different Body Sizes
Source: J Nutr Metab. 2017 Oct 26;2017:4535710. doi: 10.1155/2017/4535710 (PMC5684564; doi:10.1155/2017/4535710)
Supplement: Supplementary file 1 — Supplemental Table 1 provides the information for all 449 metabolites measured. Supplemental Table 2 provides information for clinical parameters measures. Supplemental Table 3 provides the information for metabolites in the blue module. Supplemental Table 4 provides the association of the blue module metabolites with kidney function. Supplemental Table 5 provides the association of blue module associated-clinical parameters with kidney function. [file 4535710.f1.xlsx]

## Sheet: Table 1
	Metabolites	Mean small	SD small	Mean larger	SD larger	Median small	IQR small	Median larger	IQR larger	Wicoxon Pval	Ratio small/larger	Padj (Benj. & Hoc.)	Super Pathway	Sub Pathway	KEGG	HMDB	PUBCHEM	RI	Mass
131	creatine	2.31581	1.32167	0.824544	0.330649	1.82732	1.60678	0.760596	0.437947	1.6359e-10	2.8086	7.3452e-08	Amino acid	Creatine metabolism	C00300	HMDB00064	586	758	132.1
132	creatinine	0.88416	0.109892	1.13649	0.173186	0.891602	0.142594	1.11548	0.242395	1.09936e-09	0.777975	2.46807e-07	Amino acid	Creatine metabolism	C00791	HMDB00562	588	730	114.1
89	5-oxoproline	0.873309	0.134072	1.11926	0.184254	0.860149	0.22825	1.07942	0.264224	2.18875e-09	0.780258	3.27583e-07	Amino acid	Glutathione metabolism	C01879	HMDB00267	7405	744	128.2
161	gamma-glutamylphenylalanine	0.820265	0.156531	1.15656	0.278385	0.80635	0.227499	1.09716	0.339062	3.25895e-08	0.70923	3.65817e-06	Peptide	gamma-glutamyl		HMDB00594	111299	2846	295.1
445	X-18487	0.719072	0.421675	1.49325	0.832508	0.676002	0.485842	1.27541	0.698272	6.02083e-08	0.481548	5.4067e-06						1269.6	273.1
260	phenylalanine	0.908122	0.115361	1.07985	0.161166	0.913373	0.111137	1.08859	0.185148	1.52233e-06	0.840971	7.96635e-05	Amino acid	Phenylalanine & tyrosine metabolism	C00079	HMDB00159	69256656140	2056	166.1
304	hydroxyproline	0.826791	0.231477	1.14795	0.295508	0.896767	0.321628	1.16552	0.381213	1.59682e-06	0.720236	7.96635e-05	Amino acid	Urea cycle; arginine-, proline-, metabolism	C01157	HMDB00725	58106971053	705	132.1
394	X-14625	0.886248	0.149849	1.08272	0.171141	0.881929	0.146271	1.09675	0.211584	1.22944e-06	0.818536	7.96635e-05						742	308.1
436	X-17381	3.12043	3.4177	1.06105	2.64559	1.97593	2.17961	0.203474	0.935914	1.51178e-06	2.94089	7.96635e-05						4159.8	293.1
250	p-cresol sulfate	1.77323	1.35222	1.19915	1.91587	1.47916	0.867001	0.661849	0.622512	2.33187e-06	1.47874	0.000104701	Amino acid	Phenylalanine & tyrosine metabolism	C01468	HMDB11635	4615422	2896	187.1
324	X-11334	0.666537	0.611682	1.41347	0.775886	0.62144	0.958472	1.17182	0.681827	2.92667e-06	0.47156	0.000119461						982	259.1
310	urate	0.859732	0.218205	1.18949	0.351226	0.816691	0.193288	1.12286	0.413822	4.21977e-06	0.722776	0.00015789	Nucleotide	Purine metabolism, urate metabolism	C00366	HMDB00289		1928	441.2
387	X-13731	1.54252	0.787325	0.804803	0.521558	1.29902	1.07039	0.676963	0.670895	1.0339e-05	1.91664	0.000357095						1902	235
158	gamma-glutamylisoleucine	0.863958	0.20915	1.10958	0.257208	0.815541	0.300453	1.06206	0.315981	1.3634e-05	0.778637	0.00041476	Peptide	gamma-glutamyl		HMDB11170		2644	261.2
159	gamma-glutamylleucine	0.878019	0.242306	1.15654	0.289009	0.846482	0.332865	1.12959	0.386293	1.38561e-05	0.759174	0.00041476	Peptide	gamma-glutamyl		HMDB11171	151023	2744	261.2
163	gamma-glutamylvaline	0.880019	0.243941	1.13908	0.283961	0.807307	0.229414	1.08468	0.278651	1.65391e-05	0.772569	0.00046413	Peptide	gamma-glutamyl		HMDB11172		2040	247.2
269	pseudouridine	0.927171	0.127003	1.04099	0.142917	0.922188	0.131979	1.04071	0.149858	1.87941e-05	0.890659	0.000496385	Nucleotide	Pyrimidine metabolism, uracil containing	C02067	HMDB00767		1104	243.1
257	phenol sulfate	1.59344	0.835421	0.917151	0.647721	1.39473	1.20247	0.756991	0.642177	2.45145e-05	1.73738	0.0006115	Amino acid	Phenylalanine & tyrosine metabolism	C02180		74426	2150	173.1
373	X-12668	1.38614	0.597765	0.808137	0.505481	1.3364	0.613462	0.730536	0.767066	2.86175e-05	1.71523	0.000676276						2318	246.1
115	C-glycosyltryptophan	0.861373	0.229649	1.09148	0.22279	0.79573	0.349413	1.06709	0.275378	4.14768e-05	0.78918	0.000931154	Amino acid	Tryptophan metabolism				1912	367.1
213	myo-inositol	0.892263	0.21098	1.13321	0.257582	0.892661	0.242434	1.12322	0.403702	5.18586e-05	0.787379	0.00110879	Lipid	Inositol metabolism	C00137	HMDB00211		1924.9	217
36	17-methylstearate	1.37983	0.557369	0.96971	0.513411	1.21968	0.777152	0.81861	0.447181	5.56242e-05	1.42293	0.00113524	Lipid	Fatty acid, branched		HMDB61710	3083779	5987	297.4
390	X-14314	0.895202	0.183992	1.13425	0.283181	0.891981	0.228406	1.13602	0.377824	6.33935e-05	0.789249	0.00123755						2302	241.1
166	glutamine	0.934379	0.128556	1.04831	0.123289	0.91132	0.149255	1.03997	0.147304	8.2023e-05	0.891317	0.00153451	Amino acid	Glutamate metabolism	C00064	HMDB00641	5961	684	147.2
355	X-12010	0.820573	0.270806	1.14685	0.508717	0.834409	0.29739	1.08738	0.371681	9.23041e-05	0.715504	0.00165778						1707	203.1
175	glycolate (hydroxyacetate)	0.916871	0.146175	1.05071	0.134823	0.895728	0.211392	1.03552	0.150195	0.000109989	0.872617	0.00189943	Xenobiotics	Chemical	C00160	HMDB00115	3698251757	1119	177
162	gamma-glutamyltyrosine	0.843743	0.284429	1.13229	0.31177	0.866409	0.335056	1.1562	0.416013	0.000116533	0.745166	0.0019379	Peptide	gamma-glutamyl		HMDB11741	94340	2073	311.2
381	X-12822	0.913789	0.378294	1.464	0.750824	0.891223	0.362331	1.2545	0.980497	0.000262297	0.624173	0.00420612						2786	389.1
317	xylonate	0.680619	0.43463	1.17488	0.65702	0.762925	0.721484	1.22957	0.72658	0.000282289	0.579307	0.00437062	Carbohydrate	Nucleotide sugars, pentose metabolism	C05411	HMDB60256	6602431	1722	292
266	pro-hydroxy-pro	4.62304	7.99548	24.5113	37.0103	0.5808	0.616967	14.9784	25.2021	0.000308308	0.188608	0.00461434	Peptide	Dipeptide		HMDB06695	11673055	960	229.2
208	mannitol	0.566336	0.663463	1.69186	2.67473	0.0319868	0.994102	1.30494	0.927574	0.00032064	0.334742	0.00464411	Carbohydrate	Fructose, mannose, galactose, starch, and sucrose metabolism	C00392	HMDB00765	6251	1839	319.1
185	hydroquinone sulfate	1.51114	0.717486	0.962136	0.524536	1.37879	0.95181	0.896566	0.629618	0.000351169	1.57061	0.00492734	Xenobiotics	Drug	C00530	HMDB02434	161220	1383	189
155	ethanolamine	0.665214	0.495647	1.08183	0.489927	0.788597	1.04436	1.12106	0.651904	0.000384184	0.614898	0.00522724	Lipid	Glycerolipid metabolism	C00189	HMDB00149		1304	174.1
78	4-ethylphenylsulfate	1.31034	0.537133	0.873627	0.450237	1.22137	0.752229	0.852978	0.60715	0.000493117	1.49988	0.00647566	Xenobiotics	Benzoate metabolism	C13637			3570	201.1
104	arabonate	0.839262	0.270878	1.21037	0.57471	0.830787	0.366955	1.09772	0.48286	0.000529025	0.693392	0.00647566	Cofactors and vitamins	Ascorbate and aldarate metabolism		HMDB00539	122045	1736	292.1
240	N6-carbamoylthreonyladenosine	0.924702	0.167822	1.05989	0.182931	0.918206	0.208085	1.03286	0.239699	0.000528278	0.872449	0.00647566	Nucleotide	Purine metabolism, guanine containing		HMDB41623		2656	413
254	pantothenate	1.30443	0.475213	0.990818	0.54289	1.10786	0.705835	0.784311	0.433222	0.000548052	1.31652	0.00647566	Cofactors and vitamins	Pantothenate and CoA metabolism	C00864	HMDB00210	6613	2218	220.1
271	pyroglutamine	0.914982	0.329696	1.2344	0.447493	0.899615	0.321377	1.21744	0.458022	0.000548052	0.741238	0.00647566	Amino acid	Glutamate metabolism			134508	764	129.2
160	gamma-glutamylmethionine	0.954138	0.253641	1.24285	0.427731	0.889824	0.270387	1.12521	0.507734	0.000738017	0.767702	0.00849665	Peptide	gamma-glutamyl		HMDB29155	7009567	1993	279.2
421	X-16940	4.1512	5.12911	1.20416	1.57341	2.21337	3.53692	0.52253	1.25631	0.000853754	3.44738	0.00958338						1694.1	204.9
129	citrulline	1.20334	0.284205	0.991687	0.412477	1.20063	0.513397	0.852166	0.503313	0.000934511	1.21343	0.0101604	Amino acid	Urea cycle; arginine-, proline-, metabolism	C00327	HMDB00904	833	715	176.1
307	tyrosine	0.936625	0.170503	1.08455	0.187644	0.932456	0.17916	1.07285	0.242201	0.000950418	0.863609	0.0101604	Amino acid	Phenylalanine & tyrosine metabolism	C00082	HMDB00158	60576942100	1516	182.1
176	gulono-1,4-lactone	0.872023	0.398018	1.27994	0.618035	0.836325	0.437453	1.12758	0.54977	0.00105125	0.681299	0.010977	Cofactors and vitamins	Ascorbate and aldarate metabolism	C01040	HMDB03466	608	1862	333.1
34	15-methylpalmitate (isobar with 2-methylpalmitate)	1.16152	0.299377	0.945893	0.299001	1.09575	0.4276	0.899313	0.322125	0.00112387	1.22796	0.0112137	Lipid	Fatty acid, branched		HMDB61709		5698	269.4
416	X-16394	0.870013	0.331083	1.09515	0.302781	0.794409	0.375856	1.1263	0.341958	0.00110529	0.794425	0.0112137						1719	229.2
316	xylitol	0.875459	0.37863	1.17291	0.464702	0.79018	0.381001	1.08599	0.505875	0.00141616	0.746399	0.0138229	Carbohydrate	Nucleotide sugars, pentose metabolism	C00379	HMDB00568	6912	1677.6	217
106	arginine	1.07038	0.180891	0.928546	0.190762	1.06304	0.217099	0.875391	0.28013	0.00158724	1.15275	0.0151632	Amino acid	Urea cycle; arginine-, proline-, metabolism	C00062	HMDB00517	5246487232	728	173.2
37	2'-deoxycytidine	0.911151	0.236211	1.08999	0.239566	0.86853	0.278435	1.03443	0.416307	0.0022211	0.835925	0.0207765	Nucleotide	Pyrimidine metabolism, cytidine containing	C00881	HMDB00014	13711	1256	228
38	2'-O-methylguanosine	0.734298	0.453346	1.24856	1.12679	0.840038	0.489256	1.10441	0.535215	0.00236504	0.588116	0.0216715	Nucleotide	Purine metabolism, guanine containing	C04545			1926	298
248	ophthalmate	0.677727	0.595045	1.43875	1.22423	0.698101	0.981769	1.20244	1.07861	0.00259809	0.471053	0.0233309	Amino acid	Glutathione metabolism		HMDB05765	9817431	1457	290.1
183	homocitrulline	0.887173	0.349523	1.15679	0.406608	0.891098	0.507178	1.23079	0.572151	0.00276462	0.766926	0.0243395	Amino acid	Urea cycle; arginine-, proline-, metabolism	C02427	HMDB00679	650726991977	832	190.1
87	5-methylcytidine	1.08418	0.148169	0.960346	0.286599	1.0784	0.227977	0.885928	0.326361	0.00292909	1.12895	0.0252916	Nucleotide	Pyrimidine metabolism, cytidine containing		HMDB00982	92918	1388	258
232	N-formylmethionine	0.944015	0.150848	1.06127	0.173816	0.916338	0.168806	1.06577	0.219628	0.00343869	0.889513	0.0291315	Amino acid	Cysteine, methionine, SAM, taurine metabolism	C03145	HMDB01015	439750	1541	176.1
113	bilirubin (E,E)*	0.89668	0.95248	1.79734	1.73008	0.710239	1.18138	1.22728	1.64217	0.00378141	0.498894	0.0314417	Cofactors and vitamins	Hemoglobin and porphyrin metabolism		HMDB00054	5315454	4625	585.2
431	X-17299	0.877814	0.279963	1.06045	0.272139	0.830166	0.390123	1.07776	0.319475	0.00390228	0.827771	0.0314805						1265.9	229.2
442	X-18156	0.851425	0.355081	1.07297	0.253662	0.780862	0.563662	1.06924	0.33543	0.0039263	0.793519	0.0314805						1392	272.1
253	palmitoyl sphingomyelin	0.930255	0.226626	1.11042	0.289364	0.921082	0.215783	1.10579	0.363362	0.0040266	0.837753	0.0317183	Lipid	Sphingolipid		HMDB61712	9939941	2524	311.3
422	X-16945	1.64709	1.3165	0.953519	0.819194	1.35663	1.07723	0.734539	1.0895	0.00470307	1.72738	0.0364082						3457.9	351
134	cysteine-glutathione disulfide	0.929778	0.293171	1.14547	0.464864	0.916659	0.360596	1.06201	0.293608	0.00500093	0.811701	0.038058	Amino acid	Glutathione metabolism		HMDB00656	4247235	821	427.1
83	4-vinylphenol sulfate	1.1446	0.34722	0.888166	0.36645	1.17155	0.422974	0.830275	0.57319	0.00527952	1.28872	0.0395084	Xenobiotics	Benzoate metabolism	C05627	HMDB04072	6426766	3323	199.1
153	erythritol	0.945929	0.196588	1.0935	0.236443	0.925832	0.268458	1.07573	0.359447	0.00543573	0.865051	0.0400106	Xenobiotics	Sugar, sugar substitute, starch	C00503	HMDB02994		1517.5	217
139	dihomo-linolenate (20:3n3 or n6)	1.1678	0.309229	0.981041	0.40009	1.20362	0.489306	0.953588	0.360599	0.00592973	1.19037	0.0429427	Lipid	Essential fatty acid	C03242	HMDB02925	5312529	5600	305.4
101	anthranilate	1.36169	0.603842	0.999382	0.420497	1.12574	0.573954	0.954491	0.495198	0.00694156	1.36253	0.0486994	Amino acid	Tryptophan metabolism	C00108	HMDB01123	3734162227	3213	138.1
206	lysine	0.90626	0.427514	1.20128	0.558822	0.819164	0.516797	1.04867	0.574544	0.00694156	0.754412	0.0486994	Amino acid	Lysine metabolism	C00047	HMDB00182	5962	1836.7	317.2
299	threitol	0.941969	0.266131	1.09357	0.276113	0.916773	0.260279	1.06754	0.397957	0.00714137	0.861368	0.0492757	Carbohydrate	Nucleotide sugars, pentose metabolism	C16884	HMDB04136	169019	1513	217.1
300	threonate	0.869054	0.423871	1.18048	0.523812	0.863641	0.635456	1.15384	0.697102	0.00724319	0.736187	0.0492757	Cofactors and vitamins	Ascorbate and aldarate metabolism	C01620	HMDB00943	151152	1560.7	292.1
65	3-hydroxy-2-ethylpropionate	1.20382	0.55269	0.914837	0.495591	1.1084	0.557556	0.841767	0.560555	0.00805723	1.31589	0.0539955	Amino acid	Valine, leucine and isoleucine metabolism		HMDB00396	188979	1269	247.1
70	3-methoxytyrosine	1.00723	0.34317	1.30958	0.642047	0.914266	0.245617	1.1257	0.517051	0.00857078	0.769128	0.0557722	Amino acid	Phenylalanine & tyrosine metabolism		HMDB01434	9307	1765	212.1
227	N-acetylserine	0.921888	0.228752	1.04712	0.210339	0.890311	0.324683	1.0554	0.23391	0.00853706	0.880407	0.0557722	Amino acid	Glycine, serine and threonine metabolism		HMDB02931	65249	1526	218
334	X-11530	0.956275	0.433961	1.44164	0.939593	0.872298	0.545964	1.23001	1.06938	0.00957298	0.663326	0.0614038						4866	313.2
284	sorbitol	0.651159	0.514397	0.952533	0.446388	0.75495	1.04627	1.03645	0.389183	0.00984865	0.683608	0.0622823	Carbohydrate	Fructose, mannose, galactose, starch, and sucrose metabolism	C00794	HMDB00247	107428	1843	319.1
302	thymol sulfate	1.28372	1.03891	0.789688	0.696114	1.18957	1.07709	0.840557	1.04411	0.0101313	1.6256	0.0631798	Xenobiotics	Food component/Plant	C09908	HMDB01878		4395	229.1
397	X-15439	1.49483	1.62279	0.929967	0.699622	1.28707	0.841465	0.85541	0.78394	0.010718	1.6074	0.0659232						3616	348.9
378	X-12721	1.0419	0.320363	0.864954	0.377348	1.02779	0.340671	0.911735	0.376831	0.0123172	1.20458	0.0747355						1865	261
264	phosphoethanolamine	0.753405	0.586285	1.1647	0.639163	0.822262	1.19448	1.08166	0.75531	0.012661	0.646866	0.0757971	Lipid	Glycerolipid metabolism	C00346	HMDB00224	52323241015	1577.3	299.1
102	arabinose	0.63717	0.8327	1.60805	1.99041	0.0337492	1.37375	1.41515	2.15686	0.0134083	0.396239	0.079215	Carbohydrate	Nucleotide sugars, pentose metabolism	C00216	HMDB00646	66308	1631.6	217
16	1-methylhistidine	0.943022	0.552775	1.11115	0.381859	0.776917	0.50439	1.09031	0.42816	0.0145122	0.848689	0.0835383	Amino acid	Histidine metabolism	C01152	HMDB00001	921057020397	1757.7	196
124	cholesterol	0.970481	0.154119	1.05977	0.20153	0.974437	0.158287	1.03352	0.179445	0.0145122	0.915743	0.0835383	Lipid	Sterol/Steroid	C00187	HMDB00067	6432564	2316.9	329.3
348	X-11852	1.2754	0.566411	0.9847	0.574753	1.31986	1.10298	0.758251	0.824013	0.015311	1.29521	0.0870208						3324	233.1
415	X-16209	0.903247	0.293424	1.05625	0.382101	0.934849	0.304306	1.09903	0.549488	0.0179539	0.855147	0.100766						5168.9	271.2
360	X-12161	0.901267	0.292069	1.09714	0.340114	0.922472	0.347609	1.04146	0.376999	0.0202631	0.821466	0.112323						2119	222.1
368	X-12355	1.36119	0.814279	0.942401	0.504829	1.14878	1.13116	0.886178	0.498223	0.0207785	1.44439	0.113775						3559	206.1
148	EDTA	1.08416	0.217862	0.980916	0.157655	1.04879	0.189507	0.976741	0.160691	0.021846	1.10526	0.118179	Xenobiotics	EDTA	C00284	HMDB15109	52323056049	611	291.1
429	X-17224	0.74741	0.591762	1.32769	1.4563	0.687242	1.07004	1.1112	1.14057	0.0223941	0.562942	0.119702						2121	180.2
45	2-hydroxyglutarate	1.32916	0.826486	0.953775	0.396688	1.24489	0.716151	0.90791	0.41209	0.0244412	1.39358	0.129107	Lipid	Fatty acid, dicarboxylate	C02630	HMDB00606	43	1576	247
63	3-aminoisobutyrate	0.784788	0.799237	1.06932	0.822989	0.753578	1.14896	1.07997	1.57031	0.0250627	0.73391	0.130737	Nucleotide	Pyrimidine metabolism, thymine containing; Valine, leucine and isoleucine metabolism/	C05145	HMDB03911	64956	1252.2	101.9
290	stearoyl sphingomyelin	0.919103	0.232764	1.05854	0.280526	0.871215	0.319956	1.03601	0.394256	0.0253321	0.868276	0.130737	Lipid	Sphingolipid	C00550	HMDB01348	6453725	2645	311.3
32	10-nonadecenoate (19:1n9)	1.21092	0.493669	1.01053	0.535933	1.13118	0.577098	0.882688	0.483778	0.0256976	1.1983	0.131116	Lipid	Long chain fatty acid		HMDB00772	5312513	5775	295.4
199	lactate	0.959993	0.288584	1.09085	0.304883	0.919899	0.226782	1.04961	0.381819	0.0269211	0.880043	0.135815	Carbohydrate	Glycolysis, gluconeogenesis, pyruvate metabolism	C00186	HMDB00190	612	1102.8	116.9
157	gamma.glutamylalanine	0.995009	0.360292	1.19511	0.413777	0.967023	0.388894	1.05285	0.525656	0.0279151	0.832567	0.139266	Peptide	gamma-glutamyl		HMDB06248	440103	1108	219
172	glycerol 3-phosphate (G3P)	1.07598	0.570832	1.08422	0.247507	0.920016	0.192126	1.02672	0.317431	0.0285953	0.992395	0.141091	Lipid	Glycerolipid metabolism	C00093	HMDB00126	754	1719.7	357.1
66	3-hydroxybutyrate (BHBA)	1.22655	0.414584	1.08038	0.539459	1.12352	0.531916	0.94525	0.53536	0.0299986	1.1353	0.144832	Lipid	Ketone bodies	C01089	HMDB00357	441	1203.5	116.9
184	homocysteine	0.777584	0.591405	0.964185	0.466816	0.7167	0.560938	1.05661	0.522517	0.029803	0.806467	0.144832	Amino acid	Cysteine, methionine, SAM, taurine metabolism	C00155	HMDB00742	778	1648.2	234
68	3-hydroxypropanoate	0.938429	0.190915	1.04428	0.272457	0.905397	0.262384	1.03747	0.288259	0.0305387	0.898633	0.145871	Lipid	Fatty acid, monohydroxy	C01013	HMDB00700	5459847	1187.1	177.1
331	X-11441	0.97672	0.458431	1.34642	0.815507	0.866125	0.416142	1.10467	0.911126	0.0314578	0.72542	0.14868						3773	331.1
372	X-12602	1.19204	0.496074	0.935582	0.341341	1.14656	0.67149	0.941017	0.434132	0.0322143	1.27412	0.150669						1456	204.2
96	alpha-hydroxyisocaproate	0.981289	0.51533	1.12111	0.423438	0.891528	0.370323	1.04919	0.46977	0.035284	0.875282	0.161658	Amino acid	Valine, leucine and isoleucine metabolism	C03264	HMDB00746	83697	1274	102.8
342	X-11643	7.14351	10.1267	2.60168	5.98106	2.49416	11.4801	0.928294	0.93281	0.035284	2.74573	0.161658						3961	291.2
239	N6-acetyllysine	0.848038	0.337494	1.04971	0.400387	0.929748	0.576514	1.02083	0.585967	0.04064	0.807877	0.182474	Amino acid	Lysine metabolism	C02727	HMDB00206	699197892832	1134	189.1
428	X-17185	1.66363	1.21533	1.2285	1.13331	1.25891	1.60925	0.830092	1.12752	0.0406364	1.3542	0.182474						3069.1	215.2
229	N-acetyltryptophan	1.24268	0.527984	1.00159	0.390447	1.12484	0.749461	0.954587	0.469424	0.0411063	1.24071	0.18274	Amino acid	Tryptophan metabolism	C03137	HMDB13713	700653	2650	245.2
97	alpha-hydroxyisovalerate	0.951984	0.579572	1.14766	0.562838	0.799683	0.485174	1.03372	0.52869	0.0425325	0.8295	0.183767	Amino acid	Valine, leucine and isoleucine metabolism		HMDB00407	99823	1208	145.1
207	malate	1.15022	0.417044	0.955407	0.316786	1.06353	0.473614	0.952769	0.33284	0.0425325	1.20391	0.183767	Energy	Krebs cycle	C00149	HMDB00156	525	1502	233
212	3-methylglutarylcarnitine (C6)	0.83661	0.480266	1.09578	0.750116	0.872316	0.469389	1.1355	0.670437	0.0425652	0.763486	0.183767	Amino acid	Valine, leucine and isoleucine metabolism		HMDB00552	128145	1900	290.1
376	X-12712	1.09967	0.436661	0.903712	0.450631	1.10933	0.518101	0.862835	0.554314	0.0435063	1.21683	0.186041						1690	219
417	X-16480	0.938832	0.291112	1.31845	0.918251	0.971483	0.372319	1.13755	0.693389	0.0450023	0.71207	0.190623						4685.5	309.3
332	X-11442	0.987754	0.521207	1.37299	0.879756	0.916022	0.47375	1.05098	0.939391	0.045507	0.719416	0.190959						3902	331.1
413	X-16120	0.877615	0.289547	1.04216	0.286498	0.927088	0.376316	1.0099	0.385327	0.0475921	0.842115	0.19786						1271.7	164.1
165	glutamate	1.19264	0.463272	1.01384	0.40251	1.11151	0.518916	0.938869	0.345565	0.0499279	1.17636	0.205666	Amino acid	Glutamate metabolism	C00025	HMDB03339	611	1611.9	246
103	arabitol	0.964204	0.397516	1.14319	0.378297	0.923535	0.464898	1.02658	0.58698	0.0533915	0.843431	0.217934	Carbohydrate	Nucleotide sugars, pentose metabolism	C00474	HMDB01851	94154	1687.5	307.1
242	nonadecanoate (19:0)	1.20573	0.453499	1.05769	0.578704	1.1811	0.615059	0.962675	0.664337	0.0545892	1.13997	0.220816	Lipid	Long chain fatty acid	C16535	HMDB00772	12591	6073	297.3
189	indoleacetylglutamine	0.767812	0.539351	1.34939	1.42472	0.838873	1.05002	1.13093	0.717613	0.0558089	0.569005	0.221754				HMDB13240		2530	302.2
398	X-15458	0.894149	0.343376	1.0472	0.30256	0.917809	0.498489	1.00384	0.355497	0.0555137	0.85385	0.221754						1820	302.2
303	tiglyl carnitine	1.05194	0.306785	0.900439	0.312811	1.07866	0.402971	0.96891	0.40188	0.0583157	1.16825	0.227685	Amino acid	Valine, leucine and isoleucine metabolism		HMDB02366		2317	244.1
325	X-11378	1.34686	0.745405	0.989936	0.487322	1.13473	1.13421	0.977857	0.719472	0.0579745	1.36055	0.227685						5325	445.4
407	X-15667	1.52381	0.885741	1.23716	1.07094	1.23986	1.69045	0.841261	0.769851	0.0598758	1.23171	0.231761						2330	202.2
147	dodecanedioate	0.975657	0.497269	1.2082	0.584111	0.896986	0.356696	1.0556	0.425713	0.0622484	0.807527	0.238885	Lipid	Fatty acid, dicarboxylate	C02678	HMDB00623	12736	2990	229.2
98	alpha-ketoglutarate	1.16621	0.517767	0.984574	0.337061	1.02208	0.338132	0.875351	0.394354	0.0631594	1.18448	0.240327	Energy	Krebs cycle	C00026	HMDB00208	51	1779	419.1
358	X-12104	0.978698	0.232156	1.08198	0.30044	0.92488	0.222283	1.10326	0.359819	0.0645139	0.904542	0.243166						1755	271.1
384	X-13543	1.0523	0.649612	1.21747	0.677618	0.96606	0.383933	1.11048	0.594135	0.0649888	0.864331	0.243166						1096	484.1
268	propionylcarnitine	0.967511	0.363723	1.10381	0.37984	0.873505	0.454905	1.05095	0.434707	0.0658923	0.876516	0.244509	Lipid	Fatty acid metabolism (also BCAA metabolism)	C03017	HMDB00824	107738	1589	218.2
146	docosapentaenoate (n6 DPA; 22:5n6)	1.15787	0.345562	1.05754	0.524603	1.17243	0.447608	0.933557	0.516756	0.0680052	1.09488	0.250282	Lipid	Essential fatty acid	C06429	HMDB13123	6441454	5625	329.4
201	laurylcarnitine	1.05923	0.952628	1.6412	1.60875	0.865207	0.580635	1.10729	1.23767	0.0709089	0.645399	0.252683	Lipid	Carnitine metabolism		HMDB02250	10427569	5066	344.3
219	N-acetylaspartate (NAA)	1.21346	0.53391	0.981543	0.540733	1.10074	0.42385	0.958578	0.419608	0.0707644	1.23628	0.252683	Amino acid	Alanine and aspartate metabolism	C01042	HMDB00812	65065	1648.5	274
410	X-16013	0.972997	0.914021	1.1277	0.544098	0.954479	0.53927	1.03048	0.658424	0.070169	0.862815	0.252683						3463	363
443	X-18218	0.947544	0.226605	1.11689	0.492288	0.930093	0.314331	1.05149	0.363617	0.0694446	0.848374	0.252683						2540.9	218
12	1-heptadecanoylglycerophosphoethanolamine	1.02609	0.78182	1.46105	1.34982	0.863202	0.526745	1.11139	0.831349	0.0716505	0.702298	0.253315	Lipid	Lysolipid		HMDB61691		6029	466.3
265	pipecolate	0.955564	0.152218	1.14274	0.464959	0.986487	0.261346	1.01631	0.306802	0.0731527	0.836205	0.256606	Amino acid	Lysine metabolism	C00408	HMDB00070	849	1120	130.1
401	X-15546	1.17035	0.939592	0.840423	0.85249	1.30649	1.49445	0.7752	1.26596	0.0738045	1.39257	0.256885						1861	271.1
173	glycerophosphorylcholine (GPC)	0.980458	0.223163	1.10719	0.31561	0.950255	0.268591	1.00837	0.247306	0.0746806	0.885538	0.257935	Lipid	Glycerolipid metabolism	C00670	HMDB00086	657272	694	258.1
341	X-11561	1.12869	1.09053	1.14488	0.472078	0.864663	0.840973	1.06337	0.610331	0.0753636	0.985865	0.258307						1252	267.1
275	ribitol	0.902673	0.373151	1.05638	0.300153	0.958492	0.4695	1.02668	0.32334	0.0785615	0.854494	0.265219	Carbohydrate	Nucleotide sugars, pentose metabolism	C00474	HMDB00508		1692.4	217
391	X-14352	1.08059	0.465959	0.881412	0.497126	1.09979	0.615614	0.897583	0.48137	0.0785615	1.22597	0.265219						2635	247.2
122	catechol sulfate	1.28666	0.856705	1.00222	0.82478	1.09631	1.1039	0.739451	1.01785	0.0802008	1.2838	0.268733	Xenobiotics	Benzoate metabolism	C00090	HMDB61713	3083879	1928	188.9
86	5-methyl-2'-deoxycytidine	1.1138	0.30046	0.984961	0.262483	1.03711	0.371323	0.963268	0.362759	0.0810549	1.13081	0.269583	Nucleotide	Pyrimidine metabolism, cytidine containing	C03592	HMDB02224	440055	1480	242
179	hexadecanedioate	1.02406	0.395288	1.31587	0.753324	0.981508	0.524206	1.03873	0.61135	0.0827157	0.778238	0.27109	Lipid	Fatty acid, dicarboxylate		HMDB00672	10459	4650	285.2
343	X-11662	1.59776	1.06963	1.11244	0.622445	1.12581	1.40528	0.951797	0.732816	0.0827157	1.43627	0.27109						2385	249.1
81	4-hydroxyphenylpyruvate	0.958511	0.850373	1.28326	0.956256	0.882482	1.16809	1.06732	0.95001	0.0844039	0.746934	0.274618	Amino acid	Phenylalanine & tyrosine metabolism	C01179	HMDB00707	979	1716	179.1
329	X-11437	1.37183	0.820838	1.05879	0.694076	1.08599	1.16546	0.906805	0.891674	0.0888139	1.29566	0.286888						2888	231
125	choline	0.9313	0.248536	1.06601	0.282488	0.997218	0.192224	1.05742	0.368151	0.0896312	0.873633	0.28746	Lipid	Glycerolipid metabolism	C00114	HMDB00097	170746	674	104.2
100	anserine	1.10255	0.327524	0.995207	0.251419	1.06297	0.404795	0.997965	0.287437	0.0906218	1.10786	0.288576	Peptide	Dipeptide derivative	C01262	HMDB00194	6992114112072	1126	239.2
1	1,2-dipalmitoylglycerol	1.12154	0.701983	0.823594	0.74268	1.29262	0.980463	0.884818	1.4994	0.097016	1.36177	0.298357	Lipid	Diacylglycerol		HMDB07098	99931	2595	145
255	pelargonate (9:0)	0.961706	0.206198	1.03785	0.216987	0.950868	0.24848	1.06247	0.386167	0.0960678	0.926628	0.298357	Lipid	Medium chain fatty acid	C01601	HMDB00847	5461016	4847	157.2
279	S-propylcysteine	1.14645	0.615297	0.999069	0.539915	1.28317	0.716277	0.930325	0.47969	0.097016	1.14752	0.298357	Amino acid	Cysteine, methionine, SAM, taurine metabolism		HMDB34324	125198	2000.5	164.1
319	X-07765	1.65633	1.5761	1.36919	2.14959	1.12575	1.18548	0.947785	1.15899	0.0962216	1.20971	0.298357						3705	245.1
383	X-13483	0.929689	0.238451	1.06583	0.365955	0.973098	0.282975	1.03708	0.414391	0.0970106	0.872268	0.298357						1982	237.1
174	glycine	0.980305	0.439794	1.08447	0.308336	0.854971	0.564821	1.04914	0.352246	0.100104	0.90395	0.303695	Amino acid	Glycine, serine and threonine metabolism	C00037	HMDB00123	5257127750	1166	101.9
193	isobutyrylcarnitine	1.14949	0.417759	0.980974	0.308904	1.02998	0.549956	0.984128	0.389312	0.0999056	1.17179	0.303695	Amino acid	Valine, leucine and isoleucine metabolism		HMDB00736		1941	232.2
84	5,6-dihydrouracil	0.9391	0.233882	1.05133	0.402908	0.954746	0.211695	1.08907	0.484494	0.104109	0.893248	0.31075	Nucleotide	Pyrimidine metabolism, uracil containing	C00429	HMDB00076	649	1505.2	243
200	laurate (12:0)	1.03381	0.254589	0.969475	0.221523	1.05539	0.322958	0.960757	0.187645	0.10589	1.06636	0.31075	Lipid	Medium chain fatty acid	C02679	HMDB00638	3893	5288	199.3
237	N2,N2-dimethylguanosine	0.958066	0.174275	1.00769	0.166284	0.950962	0.213168	1.05204	0.248546	0.10589	0.950752	0.31075	Nucleotide	Purine metabolism, guanine containing		HMDB04824	92919	2157	312.1
259	phenylacetylglycine	1.37773	0.849228	1.21084	0.958353	1.14904	0.806688	0.972059	0.823486	0.104109	1.13783	0.31075	Amino acid	Phenylalanine & tyrosine metabolism	C05598	HMDB00821	68144	2377	192.1
336	X-11538	1.00234	0.33895	1.29383	0.813918	0.936586	0.396013	1.15214	0.791187	0.10589	0.774713	0.31075						4920	311.3
392	X-14568	1.06558	0.228967	1.00145	0.189432	1.057	0.238635	0.97867	0.191189	0.108988	1.06404	0.317762						628	133.1
345	X-11787	1.01053	0.177843	1.07785	0.200385	0.960769	0.263417	1.0486	0.209242	0.111092	0.937543	0.321808						1126	148.1
44	2-hydroxybutyrate (AHB)	1.09899	0.363374	0.989271	0.422455	1.02092	0.39699	0.96394	0.486349	0.112496	1.11091	0.323787			C05984	HMDB00008	440864	1169.4	130.9
296	taurodeoxycholate	1.50862	1.75818	2.5896	3.60907	0.99808	1.03809	1.00192	2.03647	0.113228	0.58257	0.323818			C05463	HMDB00896	2733768	5243	498.3
25	1-palmitoylplasmenylethanolamine	0.926629	0.586422	1.23346	0.837346	0.809312	0.869479	1.09108	0.920744	0.11871	0.751243	0.327						6153	436.4
79	4-hydroxymandelate	1.02946	0.248712	0.978942	0.307514	1.0404	0.268635	0.929628	0.358114	0.116493	1.05161	0.327			C03198	HMDB00822	328	1735.5	267.1
95	allantoin	1.0056	0.223737	1.0782	0.220967	0.960509	0.311548	1.05852	0.260536	0.116882	0.932667	0.327			C02350	HMDB00462	204	1809.8	518.3
119	caprylate (8:0)	0.948844	0.211337	1.01667	0.194325	0.932773	0.279673	1.00832	0.289424	0.11871	0.933283	0.327			C06423	HMDB00482	379	4367	143.2
144	docosahexaenoate (DHA; 22:6n3)	1.09492	0.348464	1.01235	0.466141	1.11237	0.480926	0.966358	0.52412	0.117598	1.08157	0.327			C06429	HMDB02183	445580	5518	327.3
164	glucose	1.00511	0.132633	0.983249	0.089727	1.00377	0.110323	0.995917	0.105439	0.11871	1.02223	0.327			C00031	HMDB00122	79025	1866.8	217.1
225	N-acetylornithine	0.963837	0.217715	1.10147	0.355187	0.981675	0.298266	1.00333	0.531864	0.119831	0.875049	0.328075			C00437	HMDB03357	6992102439232	875	175.2
76	3-ureidopropionate	1.0533	0.659891	1.16153	0.462144	0.912948	0.609577	1.08415	0.528506	0.125561	0.906819	0.338708			C02642	HMDB00026	111	1062	133.1
246	oleoylcarnitine	1.13837	1.12973	1.54647	1.28606	0.790893	0.789577	1.10119	1.66391	0.126733	0.736106	0.338708				HMDB05065		5202	426.4
328	X-11429	0.978143	0.202974	1.02525	0.392789	0.909445	0.248039	1.0319	0.383333	0.126733	0.954054	0.338708						1151	245.1
353	X-11949	1.15824	0.559715	1.00356	0.449277	1.06947	0.808742	0.889333	0.679204	0.126733	1.15413	0.338708						3830	220.1
211	methionine	0.991271	0.161582	1.06054	0.161989	0.980914	0.192294	1.00628	0.234308	0.129101	0.934684	0.342995			C00073	HMDB00696	69920876137	1252	150.1
39	2-aminobutyrate	1.08345	0.242207	1.03332	0.439999	1.08263	0.368179	0.920512	0.540676	0.130297	1.04851	0.344138			C02261	HMDB00650	4396916971251	758	104.1
349	X-11880	1.0505	0.6047	1.30136	0.803026	0.908827	0.891284	1.03568	1.01229	0.131503	0.807235	0.345291						5378	537.4
3	1,3-dipalmitoylglycerol	1.06375	0.690393	0.873245	0.505689	1.12417	1.00877	0.839453	0.887462	0.135765	1.21816	0.354409					68149	2637	371.3
370	X-12435	0.995933	0.417347	1.16679	0.573378	0.965815	0.456712	1.09008	0.610233	0.146039	0.853567	0.379026						3174	357.2
85	5-aminovalerate	1.31429	0.983009	1.23753	1.06786	1.20234	0.663025	0.855937	0.798412	0.1547	1.06203	0.399198			C00431	HMDB03355	6992101138	860	118.1
51	2-methylbutyrylcarnitine (C5)	0.929061	0.260053	1.0898	0.509143	0.954486	0.334941	1.03181	0.76338	0.156082	0.852509	0.400462				HMDB00378	6426901	2439	246.1
178	heptanoate (7:0)	0.943431	0.208342	1.01173	0.188638	0.93497	0.356175	1.04406	0.292445	0.163096	0.932496	0.411406			C17714	HMDB00666	8094	3695	129.2
301	threonine	1.10744	0.283444	1.02356	0.248356	1.03905	0.28999	0.955711	0.358768	0.163096	1.08195	0.411406			C00188	HMDB00167	69710196288	713	120.1
425	X-17010	1.00193	0.25153	1.07602	0.367095	0.945776	0.292512	1.06637	0.458919	0.161675	0.931139	0.411406						3169.5	189
168	glutathione, oxidized (GSSG)	1.15392	0.849889	1.30563	0.939849	0.924908	0.916277	1.13432	0.69309	0.165968	0.883797	0.41171			C00127	HMDB03337	6535911215652	1535	613.1
288	stearate (18:0)	1.06859	0.267701	1.00225	0.307912	1.06956	0.329244	0.962445	0.335731	0.165418	1.06619	0.41171			C01530	HMDB00827	5281	5886	283.4
354	X-11987	1.14899	0.635219	1.00858	0.739129	1.18113	0.916981	0.907342	0.849351	0.164527	1.13922	0.41171						1409	139.2
252	palmitoleate (16:1n7)	1.09332	0.4189	0.97317	0.386791	1.04235	0.497907	0.968632	0.350268	0.171291	1.12347	0.42258			C08362	HMDB03229	445638	5477	253.3
41	2-arachidonoylglycerophosphoethanolamine*	0.991011	0.289171	1.08981	0.35012	0.978831	0.350616	1.01197	0.406756	0.17481	0.909347	0.426574						5674	500.3
236	N1-methylguanosine	0.902598	0.416051	1.04291	0.570658	0.943179	0.455042	1.07666	0.556006	0.174285	0.865457	0.426574				HMDB01563	96373	1850	298.1
315	xanthine	1.04157	0.929362	1.56817	1.71031	0.74153	1.4438	1.12531	1.09645	0.177317	0.664191	0.429271			C00385	HMDB00292	1188	1889.9	353
446	X-18558	1.10768	0.360764	0.993186	0.236285	1.06065	0.297067	0.979599	0.341658	0.177827	1.11528	0.429271						1676.8	380.1
5	1-arachidonoylglycerophosphocholine	1.08846	0.898989	1.44745	1.10979	0.880576	0.857341	1.18851	1.47732	0.179361	0.751983	0.430658			C05208			5554	544.3
338	X-11542	1.08861	0.599819	1.12478	0.380868	0.957173	0.295415	1.01587	0.628657	0.183999	0.967849	0.439445						5247	245.2
216	myristoylcarnitine	1.24506	1.13429	1.64658	1.61567	0.976176	1.0992	1.10065	1.28361	0.186646	0.756148	0.443409					6426854	5113	372.4
197	kynurenate	1.03845	0.627407	1.33004	0.816982	0.978669	0.657902	1.06116	1.2596	0.190321	0.780768	0.449758			C01717	HMDB00715	3845	2243	188.1
40	2-arachidonoylglycerophosphocholine*	1.13006	1.09873	1.57774	1.41555	0.797966	0.754719	1.15619	1.67079	0.193062	0.716256	0.451484						5524	544.3
282	serine	1.17961	0.479746	1.00897	0.309913	1.03112	0.71788	0.946052	0.427547	0.193062	1.16912	0.451484			C00065	HMDB03406	59516857581	1389.1	204
435	X-17348	1.48945	1.74557	6.4251	30.8592	0.937744	0.79641	1.08144	3.46951	0.196329	0.231817	0.455483						2524	247.2
447	X-18559	0.982871	0.0986346	1.02197	0.121274	0.978349	0.11381	1.00868	0.165783	0.196801	0.961743	0.455483						1864.9	254.1
140	dihydrocholesterol	0.840742	0.591892	0.941234	0.5746	0.893952	0.520809	1.08933	0.612959	0.199636	0.893233	0.458395				HMDB00908	6665	2320.8	215.2
214	myristate (14:0)	1.20419	0.541471	1.0767	0.553728	1.06882	0.647994	0.993245	0.474824	0.200101	1.11841	0.458395			C06424	HMDB00806	11005	5439	227.3
218	N-acetylalanine	1.00818	0.203308	1.05997	0.19196	0.940438	0.204233	1.0133	0.226319	0.203434	0.951145	0.462824			C02847	HMDB00766	88064	882	130.1
291	stearoylcarnitine	1.21576	1.01791	1.84143	1.57024	0.8853	0.563919	1.22889	2.01983	0.205127	0.660228	0.462824				HMDB00848		5300	428.4
365	X-12236	4.63377	5.9815	9.9202	14.2302	0.850952	7.18057	1.24749	12.1325	0.205127	0.467104	0.462824						1321	245.1
418	X-16869	1.05035	0.48265	1.10061	0.341049	0.942312	0.441433	1.02822	0.494436	0.206822	0.954339	0.464316						5179.8	330.2
448	X-18570	1.37811	0.749046	1.22498	0.843675	1.21182	1.16503	0.935184	0.806377	0.210244	1.12501	0.469649						3243.1	207
11	1-heptadecanoylglycerophosphocholine	1.14292	1.01678	1.29856	0.992978	0.814024	0.703586	1.0779	1.08345	0.213698	0.880144	0.47425				HMDB12108		5750	510.4
14	1-linoleoylglycerophosphoethanolamine	0.913345	0.278815	0.993592	0.295608	0.925942	0.41616	1.01274	0.316166	0.220753	0.919235	0.47425				HMDB11507		5725	476.3
128	citrate	1.06046	0.241979	1.01078	0.219443	1.05683	0.269386	0.977682	0.230895	0.217209	1.04915	0.47425			C00158	HMDB00094	311	1763.4	273.1
187	iminodiacetate (IDA)	1.1168	0.371442	0.996498	0.217182	1.00626	0.423465	0.990495	0.266232	0.218976	1.12072	0.47425				HMDB11753	8897	1538.8	232
312	uridine	0.977581	0.554808	1.12913	0.611656	0.940841	0.597432	1.03188	0.78214	0.220325	0.86578	0.47425			C00299	HMDB00296	6029	1430	243.1
318	xylose	0.858823	0.436146	1.02018	0.354998	0.996106	0.408297	1.03608	0.268654	0.215452	0.841832	0.47425			C00181	HMDB00098	95259	1723.9	204
382	X-13215	0.983626	0.231468	1.09618	0.362879	0.935496	0.323934	1.06354	0.397236	0.220325	0.89732	0.47425						5179	149.2
402	X-15609	0.946911	0.908634	2.8057	6.25545	0.979232	1.14072	1.05287	2.33916	0.216776	0.337495	0.47425						3664	273.1
69	3-indoxyl sulfate	1.14945	0.549347	1.04112	0.755828	1.03081	0.769317	0.811835	1.07089	0.227958	1.10405	0.485102				HMDB00682	10258	2258	212
245	oleate (18:1n9)	1.1432	0.446218	1.05664	0.463896	1.07	0.556016	0.947727	0.537072	0.227965	1.08192	0.485102			C00712	HMDB00207	445639	1984.4	339.2
26	1-pentadecanoylglycerophosphocholine	1.266	1.32561	1.35218	0.890764	0.936433	0.594083	1.13823	1.39001	0.231221	0.936269	0.48971						5563	482.3
46	2-hydroxyisobutyrate	1.11202	0.329896	1.11434	0.594242	1.03956	0.307556	0.971146	0.474886	0.235344	0.997913	0.496101				HMDB00729	11671	1107.5	130.9
62	3-(4-hydroxyphenyl)propionate	0.871242	0.543559	1.45369	1.6796	0.891261	0.741166	1.24206	1.72367	0.238692	0.599333	0.500808			C01744	HMDB02199	10394	1727.9	179.1
313	valerate	1.01874	0.50981	0.915914	0.469491	1.10883	0.474659	0.970926	0.380466	0.240988	1.11226	0.503273			C00803	HMDB00892	7991	1774	101.2
403	X-15636	2.4792	2.95698	1.71279	2.40449	1.62043	3.23471	0.295886	2.37715	0.24289	1.44746	0.504897						3814	243.1
323	X-11327	1.1485	0.44066	1.00458	0.340404	1.11492	0.31182	0.998382	0.497592	0.246726	1.14327	0.508166						5176	269.2
339	X-11549	1.06258	0.55311	1.13192	0.506773	0.882411	0.683839	1.0686	0.497695	0.246719	0.938739	0.508166						5093	339.3
42	2-docosapentaenoylglycerophosphocholine*	1.08622	0.791608	1.56928	1.35466	0.886708	0.819668	1.05979	1.39817	0.250605	0.692175	0.509147						5532	570.3
181	hippurate	3.31241	10.6902	2.44198	2.51169	0.706637	1.70308	1.24862	2.87127	0.24866	1.35644	0.509147			C01586	HMDB00714	464	2136	178.1
439	X-17612	1.56266	1.40205	1.7399	2.4437	1.03941	0.586332	0.931949	0.941759	0.250212	0.898129	0.509147						4298.5	567.4
59	2-stearoylglycerophosphocholine*	1.11284	0.984696	1.32108	0.94729	0.97974	0.625543	1.02722	0.998029	0.256502	0.842369	0.518116					10208382	5780	524.4
220	N-acetylfelinine*	0.848449	0.456665	1.11136	0.8343	0.927582	0.416146	1.01844	0.710067	0.258481	0.763434	0.518116						2847.1	250
380	X-12776	1.07616	0.173803	1.0247	0.126253	1.00272	0.206443	0.999231	0.106443	0.258101	1.05022	0.518116						665	119.1
6	1-arachidonoylglycerophosphoethanolamine	0.984101	0.318474	1.09109	0.376983	0.967361	0.491245	1.0025	0.451593	0.266543	0.901941	0.523251				HMDB11517		5731	500.3
75	3-phosphoglycerate	1.218	0.71522	0.99385	0.30574	1.06163	0.43516	0.960181	0.455735	0.268584	1.22553	0.523251			C00597	HMDB00807		1754	299
142	dimethylarginine (SDMA + ADMA)	1.02121	0.210462	1.04344	0.217471	0.946669	0.226173	1.04797	0.282178	0.266159	0.978693	0.523251			C03626	HMDB01539/HMDB03334	123831	812	203.2
151	eicosenoate (20:1n9 or 11)	1.12515	0.457156	1.06267	0.589308	1.03113	0.500054	0.920945	0.619613	0.272696	1.0588	0.523251				HMDB02231		5955	309.4
194	isoleucine	1.00193	0.183085	1.07375	0.236067	0.985937	0.19436	1.02331	0.334337	0.266159	0.933109	0.523251			C00407	HMDB00172	791	1614	132.1
223	N-acetylleucine	1.13422	0.441372	1.01642	0.4394	1.11004	0.457869	0.939114	0.693969	0.266159	1.11589	0.523251			C02710	HMDB11756	70912	3444	174.1
241	nicotinamide	1.10719	0.525503	0.96617	0.413261	1.05269	0.760151	0.947919	0.610558	0.268581	1.14595	0.523251			C00153	HMDB01406	936	1267	123.1
263	phosphate	0.997923	0.0939829	1.02537	0.0929335	0.990865	0.10265	1.01662	0.125418	0.270635	0.973228	0.523251			C00009	HMDB01429	1061	1307.7	298.9
287	stearamide	1.06555	0.314751	0.942681	0.541979	1.02404	0.371278	0.994748	0.520058	0.272696	1.13034	0.523251			C13846		31292	2071	131
393	X-14588	0.995479	0.107422	1.01216	0.0801777	0.985582	0.149316	1.00206	0.0932761	0.270627	0.983521	0.523251						648	151
24	1-palmitoylglycerophosphoinositol	0.956281	0.474709	0.818691	0.521349	1.08209	0.571384	0.931167	0.904132	0.274769	1.16806	0.524984						5573	571.3
337	X-11541	0.975677	0.468723	1.07461	0.433624	0.983208	0.490719	1.09072	0.665464	0.278946	0.907932	0.530706						4984	399
29	1-stearoylglycerophosphoethanolamine	1.44777	0.834593	1.1893	0.628634	1.21862	1.05184	0.971548	0.669499	0.283166	1.21733	0.531972				HMDB11130	9547068	6200	480.4
202	leucine	0.978333	0.179673	1.04726	0.236006	0.996482	0.270851	1.00352	0.26811	0.283166	0.934181	0.531972			C00123	HMDB00687	70457986106	1674	132.2
361	X-12189	1.02201	0.788364	1.82907	2.26232	0.901518	0.921851	1.00267	1.97552	0.282784	0.558756	0.531972						1249	273.1
231	N-acetylvaline	0.969291	0.283666	1.05138	0.329197	0.92051	0.37395	1.01235	0.432465	0.287429	0.921924	0.537731				HMDB11757	66789	2654	160.1
111	beta-hydroxypyruvate	1.00352	0.509202	0.856717	0.471267	1.02437	0.489392	0.969463	0.509278	0.289576	1.17136	0.539501			C00168	HMDB01352	964	1425.1	221
31	10-heptadecenoate (17:1n7)	1.1389	0.479135	1.03006	0.495	1.06699	0.797254	0.936576	0.508683	0.295701	1.10567	0.544844					5312435	5558	267.3
335	X-11533	0.953948	0.2581	1.03498	0.276273	0.99019	0.219034	1.02017	0.221737	0.296084	0.921707	0.544844						4904	243.2
449	X-18572	1.59958	1.06431	1.98317	2.61702	1.33329	1.86364	0.932442	1.17426	0.293904	0.806576	0.544844						4543.7	285.2
215	myristoleate (14:1n5)	1.31811	0.786325	1.17627	0.779598	1.11147	0.750465	0.989968	0.581441	0.304912	1.12058	0.556527			C08322	HMDB02000	5281119	5338	225.3
330	X-11438	1.2255	0.712709	1.22557	1.01071	1.15395	0.710577	0.921993	1.23199	0.304525	0.999948	0.556527						3092	241.2
379	X-12729	1.7149	1.60391	2.87015	4.14653	1.08183	1.10684	0.717117	2.96625	0.31352	0.597494	0.567623						2077	228.1
404	X-15644	1.30102	1.06834	1.22393	1.08184	1.03677	0.61467	0.844627	0.932453	0.31352	1.06299	0.567623						2697	172.2
57	2-palmitoylglycerophosphocholine*	1.17244	1.04471	1.35886	0.975379	0.968034	0.712363	1	1.42414	0.318479	0.862809	0.569709						5604	496.3
77	4-acetylphenol sulfate	1.14821	0.998479	1.33902	0.985335	0.86131	0.531493	1.06242	1.05122	0.318479	0.857503	0.569709			C00548		4684006	2399	215
292	succinate	0.979185	0.185569	1.06068	0.228453	0.999774	0.18298	1.00926	0.313601	0.316191	0.923171	0.569709			C00042	HMDB00254	1110	1348	247
130	cortisol	1.30171	0.722165	1.20709	0.909166	1.0711	0.730907	0.940151	0.584886	0.332024	1.07838	0.585346			C00735	HMDB00063		4573	363.2
133	cysteine	0.994288	0.377861	1.03829	0.283823	0.936858	0.504028	1.00969	0.329039	0.332024	0.957619	0.585346			C00097	HMDB00574	58626419722	1560.1	218
261	phenylalanyltryptophan	0.966213	0.310726	1.04358	0.381929	0.964395	0.394946	1.07877	0.453871	0.332024	0.925868	0.585346						3349	352.2
389	X-13866	1.17949	0.588629	1.07678	0.491181	0.99355	0.719991	1.00645	0.566667	0.332435	1.09539	0.585346						2406	253.1
276	riboflavin (Vitamin B2)	1.14768	0.528367	0.968507	0.505557	0.986841	0.59187	1.01316	0.536239	0.337173	1.185	0.591371			C00255	HMDB00244	493570	3111	377.2
230	N-acetyltyrosine	1.15599	0.498411	1.00236	0.340442	1.03426	0.709745	0.976637	0.285566	0.341955	1.15327	0.595108				HMDB00866	68310	1677	222.2
306	tryptophan	0.989391	0.187554	1.02302	0.23895	0.990979	0.237656	1.03192	0.33155	0.341532	0.967127	0.595108			C00078	HMDB00929	69235166305	2445	205.1
406	X-15666	1.02196	0.272505	0.953109	0.245391	1.10781	0.350077	0.99467	0.248817	0.349209	1.07224	0.605385						2096	221.1
92	adenosine 5'-monophosphate (AMP)	1.7272	2.34103	2.02747	3.53452	0.889135	0.895145	1.03169	1.08189	0.35121	0.851903	0.606513			C00020	HMDB00045	15938965	1210	348.1
4	1,5-anhydroglucitol (1,5-AG)	1.06168	0.312234	0.982012	0.364467	1.02124	0.472967	0.997425	0.537461	0.361513	1.08113	0.617184			C07326	HMDB02712		1788.7	217
205	linolenate [alpha or gamma; (18:3n3 or 6)]	1.0309	0.438327	1.15058	0.587167	0.91239	0.590531	1.03193	0.642525	0.361513	0.895979	0.617184			C06427	HMDB01388		5450	277.3
272	pyrophosphate (PPi)	1.01322	0.287914	0.951366	0.287121	1.03894	0.289391	0.960209	0.425401	0.361513	1.06502	0.617184			C00013	HMDB00250	644102	1642.3	451
27	1-stearoylglycerol (1-monostearin)	0.978033	0.228927	1.03549	0.266966	0.94892	0.220587	1.04456	0.234113	0.36651	0.944509	0.620992			D01947		24699	2186.6	399.4
412	X-16071	1.05659	0.513311	0.925368	0.439627	1.10924	0.595961	0.967832	0.482803	0.36651	1.14181	0.620992						3616	146.2
2	1,2-propanediol	2.33737	4.9851	1.40082	1.35803	1.00563	0.663138	0.993215	0.518868	0.38642	1.66857	0.652265			C00583	HMDB01881		1041	117
118	caproate (6:0)	0.948485	0.211637	0.987117	0.171686	0.930991	0.256283	1.008	0.268397	0.391618	0.960864	0.656973			C01585	HMDB00535	8892	2766	115.2
414	X-16206	0.993728	0.0816863	1.00958	0.0596164	0.994704	0.104044	1.00022	0.0620104	0.392135	0.984301	0.656973						670.7	177
72	3-methyl-2-oxovalerate	0.974079	0.254323	1.06861	0.379955	1.00491	0.378139	0.994294	0.50549	0.402675	0.911541	0.664723			C00671	HMDB03736	47	2106	129.2
137	deoxycholate	4.95041	13.1893	20.636	79.8748	0.955419	1.22493	1.03633	4.04992	0.402139	0.239892	0.664723			C04483	HMDB00626	440355	5268	391.4
270	pyridoxate	0.927333	0.444124	1.00668	0.474101	0.990875	0.410213	1.02716	0.370997	0.402683	0.921181	0.664723			C00847	HMDB00017	6723	2210	182.1
295	taurocholate	2.28872	4.31878	2.43531	4.47962	0.871666	0.812101	1.0311	1.43209	0.402139	0.939807	0.664723			C05122	HMDB00036		5122	514.3
48	2-hydroxystearate	1.12871	0.404712	1.04119	0.355865	1.01772	0.429217	0.979024	0.340664	0.405346	1.08407	0.666668			C03045		69417	5705	299.4
274	quinate	1.02319	1.34382	1.05577	0.773596	0.990242	1.34638	1.00976	0.773907	0.407462	0.969141	0.667703			C00296	HMDB03072		1793	345.1
217	N-acetyl-beta-alanine	1.02096	0.322218	1.07701	0.322616	0.923076	0.560049	1.07272	0.500745	0.413398	0.947955	0.672521			C01073		76406	1460	132.1
395	X-15375	0.975173	0.37443	1.10509	0.384415	1.0048	0.423204	0.995202	0.463319	0.413391	0.882439	0.672521						2502	328
35	16-hydroxypalmitate	1.06837	0.703894	1.10064	0.682326	0.920305	0.636579	1.01101	0.625592	0.421545	0.970683	0.683298			C18218		10466	5232	271.3
222	N-acetylisoleucine	1.08661	0.414224	1.01365	0.446633	1.07081	0.555862	0.980479	0.51258	0.429165	1.07199	0.68919					2802421	3370	174.1
235	N1-methyladenosine	0.993519	0.169328	1.0197	0.202495	0.967953	0.222504	1.03305	0.268827	0.429165	0.974324	0.68919			C02494	HMDB03331	5460178	1356	282.1
352	X-11945	0.99472	0.197062	1.03377	0.209824	1	0.288693	1.00266	0.236871	0.429784	0.962223	0.68919						1896	283.1
277	ribulose	1.0122	0.815738	0.87279	0.861837	1.16078	1.51208	0.648032	1.2902	0.434693	1.15973	0.692117			C00309	HMDB00621/HMDB03371	79021	1662	306.1
347	X-11843	1.11019	0.831109	1.33088	1.07141	0.960728	1.39948	1.07333	1.00256	0.434693	0.834179	0.692117						2710	230.1
10	1-eicosatrienoylglycerophosphocholine	1.83077	2.20971	1.41368	1.28454	1.15057	1.54264	0.983125	1.08313	0.440908	1.29504	0.692206						5600	546.4
82	4-methyl-2-oxopentanoate	1.01139	0.261803	1.10995	0.395159	0.983956	0.356779	1.02184	0.406548	0.440915	0.911206	0.692206			C00233	HMDB00695	70	2200	129.2
109	benzoate	0.998781	0.206914	1.07538	0.302164	0.988357	0.215116	1.01862	0.305369	0.438117	0.92877	0.692206			C00180	HMDB01870	243	1291.5	179
186	imidazole propionate	0.984902	0.393348	1.05963	0.42407	0.958747	0.601815	1.00984	0.388811	0.440915	0.929477	0.692206				HMDB02271	70630	1011.7	141.1
127	cis-vaccenate (18:1n7)	1.0973	0.278515	1.06514	0.330413	1.04843	0.253972	0.97306	0.32584	0.445869	1.0302	0.693762			C08367		5282761	1987	339.3
210	margarate (17:0)	1.09936	0.391791	1.08413	0.525355	1.11816	0.480909	0.971927	0.465601	0.446542	1.01405	0.693762				HMDB02259	10465	5733	269.3
283	serotonin (5HT)	1.20985	1.30508	1.34609	1.46905	0.941268	1.30448	1.0187	0.625059	0.446534	0.898792	0.693762			C00780	HMDB00259	5202	1660	177.1
43	2-ethylhexanoate	0.983355	0.335234	1.05658	0.325081	0.978692	0.3231	1.02734	0.43409	0.44937	0.930699	0.695749					8697	1210.5	201.2
49	2-linoleoylglycerophosphocholine*	1.34419	1.42469	1.52437	1.36833	0.902051	0.798482	1.04906	1.44024	0.451517	0.881797	0.696671						5544	520.4
126	cis-aconitate	1.09244	0.424182	0.997403	0.317531	1.00429	0.521907	0.995712	0.340031	0.457917	1.09528	0.704126			C00417	HMDB00072	643757	1461	192
188	indoleacetate	1.11336	0.428144	1.21746	0.920152	1.05993	0.493954	0.903192	0.714518	0.462933	0.914496	0.705714			C00954	HMDB00197	802	3760	176.1
281	sebacate (decanedioate)	1.07166	0.45402	1.12907	0.538791	0.980581	0.425668	1.0526	0.582947	0.462933	0.949145	0.705714			C08277	HMDB00792	5192	1778	201.2
364	X-12212	10.9125	15.3957	11.1195	22.8684	1.16277	18.2001	0.912206	9.9914	0.463665	0.981387	0.705714						3607	229.1
33	12,13-hydroxyoctadec-9(Z)-enoate	1.15751	0.554692	1.17206	0.837379	1.08989	0.764475	0.898038	0.929916	0.466554	0.987587	0.706196			C14829	HMBD04705	10236635	5137	313.4
247	oleoyltaurine	1.20459	0.64428	1.1019	0.667264	1.15063	0.813183	0.980926	0.76673	0.4687	1.0932	0.706196					6437033	5599.9	388.3
333	X-11511	0.925138	0.291814	0.948418	0.376523	0.995455	0.252186	1.01123	0.288343	0.4687	0.975454	0.706196						4119	215.2
30	1-stearoylglycerophosphoinositol	1.55884	1.14417	1.46368	1.26974	1.07404	0.722832	0.946956	0.523693	0.472362	1.06501	0.706968						5800	599.4
340	X-11550	1.01655	0.225417	1.0831	0.306667	1	0.281796	1	0.424523	0.472362	0.938555	0.706968						5130	250.2
13	1-linoleoylglycerophosphocholine	1.23924	0.92037	1.35776	0.942879	0.959762	0.88367	1.05135	1.20047	0.478209	0.912707	0.713342			C04100		11988421	5574	520.4
385	X-13557	1.01508	0.262479	0.968836	0.262552	0.997882	0.271748	1.0035	0.366441	0.484096	1.04773	0.719732						3611	252
171	glycerol 2-phosphate	1.02403	0.710711	0.990086	0.405805	0.966221	0.55571	1.00289	0.31231	0.492156	1.03428	0.725759			C02979	HMDB02520	2526	1691.8	243
346	X-11795	0.859473	0.450546	0.940226	0.493039	0.995643	0.416848	1.00544	0.385058	0.492999	0.914113	0.725759						1457	148.1
356	X-12029	0.974761	0.389749	0.987792	0.409348	0.952688	0.469968	1.01529	0.401045	0.492156	0.986808	0.725759						683	329.1
314	valine	0.997428	0.153809	1.03922	0.202893	0.98789	0.230958	1.00135	0.30974	0.504113	0.959782	0.738581			C00183	HMDB00883	69710186287	1040	118.1
366	X-12263	1.13955	0.985108	1.42449	1.30495	0.88718	0.889575	1.04512	1.78223	0.504998	0.799971	0.738581						1369	275.1
136	cytidine	1.0907	0.324016	1.03547	0.330009	0.992562	0.311714	1.00744	0.527492	0.508031	1.05334	0.740603			C00475	HMDB00089	6175	1065	244
386	X-13695	1.07386	0.872656	1.20367	0.92419	0.940597	0.721025	1.13993	1.29349	0.511066	0.892155	0.742617						2511	245
327	X-11412	1.04854	0.275774	1.0089	0.30405	1.03001	0.34088	0.962103	0.363509	0.51622	1.03929	0.745282						3836	204.2
426	X-17137	1.73881	3.54708	0.849612	0.701593	0.997908	1.39418	1.07013	1.45704	0.51622	2.04659	0.745282						3465.5	449.2
28	1-stearoylglycerophosphocholine	1.00858	0.535108	1.09328	0.561597	0.966045	0.673004	1.04967	0.59264	0.522329	0.922521	0.751685					497299	5844	524.4
71	3-methyl-2-oxobutyrate	1.00676	0.230915	1.04038	0.29469	0.964108	0.306488	1.01241	0.284469	0.529466	0.967691	0.754708			C00141	HMDB00019	49	1489	115.1
351	X-11914	0.992045	0.31521	1.06099	0.442226	0.970798	0.380396	1.05259	0.43714	0.529472	0.935016	0.754708						5448	295.3
438	X-17502	1.04103	0.526165	1.09776	0.525593	0.982751	0.534303	1.07028	0.655323	0.526381	0.948327	0.754708						5093.4	297.3
23	1-palmitoylglycerophosphoethanolamine	1.04126	0.457287	1.11648	0.450817	0.981686	0.660592	1.00056	0.630283	0.535682	0.932622	0.761143				HMDB11503	9547069	5940	452.3
67	3-hydroxyisobutyrate	1.00603	0.20232	1.09091	0.379182	0.982163	0.255366	1.03237	0.376257	0.541921	0.922192	0.762411			C06001	HMDB00336	11966314	1205	177.11
191	indolelactate	1.20625	0.607931	1.09627	0.579101	1.00304	0.651612	0.981026	0.666598	0.545065	1.10032	0.762411			C02043	HMDB00671	92904	1964.9	202
224	N-acetylmethionine	1.05141	0.239747	1.03017	0.235045	1.02874	0.381401	0.996677	0.308099	0.541928	1.02062	0.762411			C02712	HMDB11745	448580	1805	190.1
278	S-methylcysteine	1.06044	0.508467	1.07887	0.36568	0.997441	0.312495	1.031	0.462596	0.541921	0.982925	0.762411				HMDB02108	705817424417	1447.8	162.1
362	X-12195	1.07411	0.903609	0.925574	0.535356	1.04991	0.991565	0.997974	0.727106	0.545065	1.16048	0.762411						3369	333
369	X-12411	1.16207	0.663902	1.4421	1.3765	0.936919	0.960385	1.10941	0.950013	0.54821	0.805819	0.76443						1077	195.2
396	X-15382	0.991899	0.475908	0.973813	0.371128	1.07948	0.54297	0.967877	0.418128	0.553414	1.01857	0.766922						2540	271
441	X-17629	1.03813	0.124886	1.0069	0.123417	0.995626	0.169114	1.00289	0.12308	0.553414	1.03102	0.766922						680.6	351.1
285	sphingosine	1.07636	0.65604	1.02317	0.801261	1.02028	0.650012	0.990612	0.979104	0.559737	1.05198	0.773298			C00319	HMDB00252	5353955	5197	300.2
251	palmitate (16:0)	0.994219	0.20675	0.983231	0.278067	1.01461	0.310126	0.996152	0.348441	0.564071	1.01117	0.776529			C00249	HMDB00220	985	5619	255.3
371	X-12450	1.16837	0.803173	1.07825	0.846742	1.04245	1.05894	0.884123	0.729193	0.567264	1.08358	0.776529						5397	251.4
399	X-15461	8.76462	11.4149	19.5405	34.8248	0.96267	15.6191	6.24974	24.2165	0.566094	0.448537	0.776529						2125	160.1
249	ornithine	1.01459	0.222643	1.02902	0.192418	0.994188	0.301528	1.02322	0.268887	0.570477	0.985975	0.778554			C00077	HMDB03374	6262	1763.8	141.9
93	adrenate (22:4n6)	1.04369	0.274738	1.06397	0.445304	1.00462	0.215305	0.992852	0.334405	0.576917	0.980933	0.780229			C16527	HMDB02226	5282844	5684	331.3
321	X-11204	0.995472	0.351718	1.00397	0.306742	0.991046	0.376944	1.00132	0.39659	0.576917	0.991539	0.780229						5263	229.2
367	X-12339	1.22466	1.54509	1.05194	1.03053	1.02042	0.460952	0.830144	0.805031	0.573693	1.16419	0.780229						1055	174.1
50	2-linoleoylglycerophosphoethanolamine*	0.999655	0.294378	1.07757	0.359987	1.01166	0.451457	0.986745	0.273822	0.583392	0.927696	0.786615						5650	476.4
400	X-15484	0.988952	0.47039	0.964176	0.347334	0.993463	0.535242	1.00654	0.306006	0.59186	1.0257	0.795644						2506	271
21	1-palmitoylglycerol (1-monopalmitin)	0.9904	0.228185	1.00601	0.202466	0.936726	0.259573	1.00208	0.218018	0.599724	0.984483	0.803809					14900	2119.5	371.3
320	X-09789	1.13715	0.661479	1.28069	0.935939	0.954547	0.842435	1.05077	0.937964	0.604939	0.887918	0.808386						2613	153.1
99	alpha-tocopherol	0.990968	0.223486	1.08228	0.366874	1.00883	0.255548	0.983077	0.548636	0.611526	0.915634	0.809429			C02477	HMDB01893	14985	2305.4	502.5
203	levulinate (4-oxovalerate)	1.06241	0.319461	1.02499	0.3029	1.00011	0.509911	0.999886	0.425098	0.611526	1.0365	0.809429				HMDB00720	11579	1867	117
363	X-12206	1.057	0.412429	0.990528	0.35933	1.00223	0.550215	0.982301	0.536423	0.609621	1.0671	0.809429						654	255.1
411	X-16015	1.05249	0.515714	1.1868	0.714694	1.05598	0.847983	0.98085	1.08878	0.612931	0.886828	0.809429						3788	268.1
123	cholate	4.18831	9.65098	11.2383	45.4846	0.88196	1.36683	1.00533	1.73466	0.631474	0.372681	0.828612			C00695	HMDB00619		5148	407.4
196	isovalerylcarnitine	1.05211	0.48198	0.968919	0.428584	0.94082	0.49946	1.01568	0.529253	0.632993	1.08586	0.828612				HMDB00688	6426851	2533	246.2
258	phenylacetylglutamine	1.16153	0.728942	1.13326	0.913407	1.01859	0.264588	0.993602	0.587269	0.631474	1.02495	0.828612			C04148	HMDB06344	306137	2868	265.2
15	1-linoleoylglycerophosphoinositol	1.12901	0.623474	1.07268	0.647593	1.07236	0.574615	0.986847	0.696751	0.63974	1.05251	0.830182						5487	595.3
221	N-acetylglutamine	1.00139	0.288958	1.00794	0.27438	0.97071	0.264324	1	0.281321	0.639734	0.993501	0.830182			C02716	HMDB06029	182230	1204	189.1
375	X-12673	1.07842	0.417109	1.27457	0.750104	1.00129	0.616988	0.998713	0.730425	0.636363	0.846104	0.830182						3634	255.2
243	octadecanedioate	1.05451	0.406991	1.26189	1.14405	0.99737	0.48167	1.01452	0.639173	0.644922	0.835661	0.832098				HMDB00782	70095	5033	313.3
262	phenyllactate (PLA)	1.30745	1.37729	1.32419	1.1634	1.00064	0.545261	0.940203	0.78825	0.644922	0.987359	0.832098			C05607	HMDB00779	3848	2237	165.1
7	1-arachidonoylglycerophosphoinositol	1.12335	0.588658	1.23644	0.688444	1.0346	0.509167	0.984053	0.492168	0.65169	0.908532	0.835732						5479	619.4
17	1-myristoylglycerophosphocholine	1.29622	1.13332	1.41012	1.24554	0.913172	0.99498	1.04326	1.23492	0.653323	0.919229	0.835732				HMDB10379	460604	5481	468.3
308	undecanoate (11:0)	1.00207	0.236215	1.03447	0.207089	1.01163	0.375754	0.997436	0.211965	0.653323	0.968674	0.835732				HMDB00947	8180	5207	185.2
309	uracil	1.02693	0.363548	1.05836	0.371107	1.03723	0.509096	0.985926	0.589026	0.66531	0.970305	0.848649			C00106	HMDB00300	1174	1370.4	241
430	X-17269	1.0146	0.235334	1.03914	0.247989	0.977136	0.189532	1.0025	0.396081	0.673913	0.976387	0.857187						4530.2	155.1
9	1-docosapentaenoylglycerophosphocholine	1.28879	1.04926	1.40215	1.38538	1.00733	1.14064	0.99267	1.48697	0.679041	0.91915	0.858844						5584	570.4
359	X-12156	1.067	0.42734	1.28936	0.916618	0.908897	0.670153	1.01039	0.753338	0.677369	0.82754	0.858844						3238	233.1
47	2-hydroxypalmitate	1.04892	0.195644	1.04013	0.30457	1.00129	0.303094	0.996257	0.427258	0.685947	1.00844	0.862717					92836	5508	271.3
289	stearidonate (18:4n3)	1.08543	0.637699	1.22706	0.9253	0.913924	0.850019	1.03729	0.956141	0.685947	0.884571	0.862717			C16300	HMDB06547	5312508	5381	275.3
105	arachidonate (20:4n6)	1.02193	0.222102	1.00761	0.266285	1.00287	0.300623	0.995854	0.237459	0.691261	1.01421	0.86658			C00219	HMDB01043	444899	5525	303.4
419	X-16932	1.91704	3.97618	0.922243	0.823352	0.980056	1.70769	1.01994	1.67164	0.692878	2.07868	0.86658						3959.3	469.2
107	asparagine	1.08899	0.350947	1.00906	0.23072	0.977861	0.415798	1	0.269218	0.701749	1.07921	0.870401			C00152	HMDB00168	62676992089	1617.5	188
170	glycerol	1.04548	0.345505	1.11371	0.385273	1.02414	0.438177	0.988848	0.462235	0.698247	0.938739	0.870401			C00116	HMDB00131	753	1311	205
408	X-15808	1.06603	0.275865	1.02558	0.243025	1.01785	0.366119	0.983366	0.313597	0.699835	1.03944	0.870401						3534	240.2
286	stachydrine	1.03257	0.318196	1.06951	0.402778	0.974589	0.390144	1.01761	0.476702	0.705258	0.965455	0.872344			C10172	HMDB04827	115244	860	144.1
73	3-methylhistidine	1.22448	0.765894	1.09128	0.459401	0.922102	0.56304	1.00334	0.304108	0.708773	1.12206	0.874283			C01152	HMDB00479	649696971061	911	168.1
64	3-dehydrocarnitine*	1.01414	0.361405	1.10609	0.530587	0.975375	0.460375	1.0238	0.599631	0.715822	0.916868	0.87576					6991982	1020	160.2
121	carnosine	1.00398	0.175094	1.01373	0.140606	0.995496	0.237646	1.0045	0.177343	0.715822	0.990387	0.87576			C00386	HMDB00033	4392246992100	813	225.2
388	X-13835	1.41568	1.18903	1.00247	0.342762	1.0655	1.11847	0.98145	0.46688	0.712294	1.41219	0.87576						1014	169.1
20	1-palmitoleoylglycerophosphocholine	1.21559	1.10535	1.15791	0.850299	0.978193	0.791848	1.05107	0.899796	0.722894	1.04981	0.877242						5524	494.3
238	N4-acetylcytidine	1.02333	0.222536	1.03184	0.323977	1.00647	0.223307	0.980925	0.45295	0.722894	0.991755	0.877242				HMDB05923	107461	2030	286.1
377	X-12718	1.00229	0.655779	1.0471	0.706355	0.902474	0.721353	1.09203	1.17926	0.719355	0.957207	0.877242						1750	324.1
80	4-hydroxyphenylacetate	1.16641	1.36872	1.25217	1.71658	1.02298	1.47073	0.996023	1.36611	0.734984	0.931512	0.882568			C00642	HMDB00020	4693933	1630.6	179
120	carnitine	0.988321	0.240052	0.955268	0.265684	1.03059	0.332097	0.96288	0.351964	0.729991	1.0346	0.882568			C00318		10917	702	162.2
138	dihomo-linoleate (20:2n6)	1.04317	0.301172	1.0807	0.489215	0.987138	0.395959	1.02464	0.560922	0.737111	0.965272	0.882568			C16525		6439848	5722	307.3
374	X-12672	1.00393	0.117808	1.01908	0.152662	0.992263	0.153406	1.01621	0.203111	0.734984	0.985138	0.882568						1797	256
433	X-17314	1.54875	1.15547	1.55923	1.33899	1.04637	1.66609	0.919012	1.6395	0.737107	0.993279	0.882568						2595	266.2
53	2-oleoylglycerophosphocholine*	1.29117	1.24575	1.34849	1.19349	0.893358	0.980635	1.0197	1.10273	0.77069	0.957492	0.883192						5640	522.4
60	3-(3-hydroxyphenyl)propionate	3.51054	4.18997	6.63576	10.9128	0.963064	5.85506	1.03398	9.72352	0.763507	0.529033	0.883192			C11457	HMDB00375	91	2000	165.1
74	3-phenylpropionate (hydrocinnamate)	1.25775	1.28277	2.49668	4.27271	1.10461	1.11095	0.738774	2.38415	0.77069	0.50377	0.883192			C05629	HMDB00764		2830	149.1
90	7-beta-hydroxycholesterol	0.996478	0.569703	0.960806	0.704686	1.00532	0.687544	0.974266	0.884767	0.77069	1.03713	0.883192			C03594	HMDB06119	473141	2340	456.4
108	azelate (nonanedioate)	1.03408	0.224298	1.02492	0.227044	1.00754	0.150289	0.999419	0.244945	0.756345	1.00894	0.883192			C08261	HMDB00784	2266	1322	187.2
116	campesterol	1.03512	0.590271	0.974898	0.758049	1.03099	0.676579	0.892156	1.57356	0.756345	1.06177	0.883192			C01789	HMDB02869	173183	2353	343.4
143	dimethylglycine	1.04216	0.249932	1.04175	0.212689	0.992099	0.225947	1.02717	0.293866	0.762205	1.00039	0.883192			C01026	HMDB00092	6971056673	1030	57.9
145	docosapentaenoate (n3 DPA; 22:5n3)	1.07541	0.371088	1.09194	0.553478	1.04168	0.533755	0.987018	0.769785	0.744254	0.984858	0.883192			C16513	HMDB01976		5574	329.4
152	equol sulfate	3.20897	4.22369	3.84391	5.29968	0.757814	6.02432	1.02932	4.75055	0.763507	0.834819	0.883192						3625	321.2
154	erythronate*	1.01851	0.235754	1.02649	0.219622	0.931797	0.226867	1.00007	0.298132	0.756345	0.992231	0.883192				HMDB00613	2781043	1546.9	292.1
169	glycerate	1.17789	0.606179	1.0963	0.433629	0.982693	0.471	1.00089	0.656142	0.769423	1.07442	0.883192			C00258	HMDB00139	752	1360.7	189
198	kynurenine	1.10185	0.36605	1.16101	0.546888	0.941745	0.488547	1.00187	0.720916	0.74068	0.949049	0.883192			C00328	HMDB00684	1611666971029	1902	209.1
273	pyruvate	1.02154	0.327511	1.01515	0.355156	1.06269	0.476058	0.977998	0.516954	0.773039	1.0063	0.883192			C00022	HMDB00243	107735	1130.6	217
293	succinylcarnitine	1.00874	0.183388	1.07003	0.502347	1.01116	0.158241	0.933026	0.483138	0.751418	0.942723	0.883192						1401	262.1
409	X-16009	1.00228	0.456592	1.05279	0.59342	1.00106	0.613835	0.935128	0.716204	0.763507	0.952021	0.883192						2191	222
420	X-16938	1.12119	0.507127	1.07293	0.333724	0.996403	0.316186	1.01543	0.262919	0.773039	1.04498	0.883192						2008.8	233.1
432	X-17305	1.08604	1.036	1.51265	1.95159	1.00962	1.28425	0.970378	1.59568	0.755009	0.71797	0.883192						2157.1	296.2
437	X-17443	1.31268	0.784761	1.62662	1.56194	1.04413	0.85447	0.974721	1.42645	0.751418	0.807001	0.883192						3102.3	271.2
150	eicosapentaenoate (EPA; 20:5n3)	1.04637	0.304588	1.05775	0.426316	1.03032	0.404229	0.953207	0.538469	0.77666	0.989247	0.885077			C06428	HMDB01999	446284	5442	301.3
234	N-stearoyl taurine	1.01653	0.457449	1.05391	0.597312	1.03724	0.445777	0.984423	0.637799	0.780286	0.964528	0.886958					168274	5785.9	390.3
444	X-18477	1.32542	0.939725	1.55676	1.42619	0.994359	0.791805	1.00215	0.892308	0.787552	0.851397	0.892957						1604.6	208.2
228	N-acetylthreonine	1.01238	0.212898	1.01888	0.22153	0.970319	0.292739	1.00525	0.192553	0.802136	0.993622	0.907202			C01118		4651717	846	160.1
91	acetylcarnitine	1.04705	0.323563	1.00512	0.308961	0.936865	0.311378	1.02271	0.316727	0.806883	1.04171	0.907776			C02571	HMDB00201	7045767	1203	204.2
94	alanine	1.04457	0.3945	1.01283	0.28538	1.01736	0.4411	0.990939	0.45551	0.816796	1.03133	0.907776			C00041	HMDB00161	59507311724	1147.6	115.9
110	beta-hydroxyisovalerate	0.996687	0.319581	0.997185	0.28525	0.97012	0.302703	1.01365	0.34095	0.813126	0.9995	0.907776				HMDB00754	69362	1043	117.1
114	butyrylcarnitine	1.08036	0.384948	1.07196	0.409528	1.0223	0.473459	0.993905	0.503644	0.816796	1.00783	0.907776					213144	2007	232.2
177	heme	1.41749	1.05586	1.56018	1.50293	0.994397	1.43013	1.0056	1.44095	0.806883	0.908543	0.907776			C00032			5057	616.2
190	indoleacrylate	1.86025	2.13456	1.9456	2.3602	0.954015	1.77692	1.04599	2.088	0.814174	0.956135	0.907776				HMDB00734	5375048	2529	186.1
244	octanoylcarnitine	1.0848	0.491337	1.13336	0.651537	0.986681	0.449663	1.01332	0.668338	0.816796	0.957159	0.907776					123701	4100	288.3
195	isovalerate	1.12268	0.586192	1.02635	0.267648	1.01341	0.254475	0.991323	0.339447	0.824146	1.09385	0.913683			C08262	HMDB00718	10430	1623	101.2
434	X-17337	1.04634	0.512182	1.12799	0.657473	1.02277	0.674101	0.981704	0.691165	0.828802	0.927613	0.916582						4692.5	328.3
88	5-methylthioadenosine (MTA)	0.914218	0.427622	1.13096	1.78614	0.999237	0.439666	1.0198	0.558525	0.84349	0.808353	0.930533			C00170	HMDB01173	439176	2427	298.1
294	taurochenodeoxycholate	2.32998	3.92518	2.3582	4.3763	0.958486	1.77589	1.03332	1.61771	0.846298	0.988032	0.931343			C05465	HMDB00951	387316	5218	498.3
58	2-palmitoylglycerophosphoethanolamine*	1.02906	0.388083	1.06061	0.357772	1.08246	0.458976	0.960045	0.456491	0.858231	0.970253	0.942166						5790	452.3
52	2-myristoylglycerophosphocholine*	1.31915	1.08014	1.30471	1.18003	0.902222	0.811384	1.0204	1.2748	0.86113	1.01106	0.943043						5450	468.3
440	X-17624	1.1923	0.773002	1.12376	0.606367	0.955187	0.791291	1.00861	0.714214	0.864849	1.061	0.944811						2913.8	267.2
55	2-oxindole-3-acetate	1.61038	2.32994	2.03442	2.96699	0.999911	0.712741	1.00621	0.651151	0.876017	0.791567	0.945508					3080590	3217.2	192.1
56	2-palmitoleoylglycerophosphocholine*	1.20976	1.11975	1.22462	0.992324	1.00768	0.672938	0.971155	1.16785	0.876015	0.987868	0.945508						5482	494.3
156	fructose	1.0604	0.372117	1.07465	0.391276	0.997847	0.258973	1.00215	0.413174	0.876017	0.986747	0.945508			C00095	HMDB00660	5984	1758	217
267	proline	0.984145	0.24434	0.990516	0.18425	1.05333	0.330881	0.983622	0.279069	0.876017	0.993567	0.945508			C00148	HMDB00162	1457426971047	796	116.1
424	X-16982	1.03701	0.35431	1.04071	0.334681	0.978291	0.52278	1.00667	0.35944	0.876017	0.996441	0.945508						1622.9	191.9
204	linoleate (18:2n6)	1.0555	0.266042	1.05241	0.327478	0.991956	0.410797	1.00561	0.339856	0.879745	1.00294	0.947255			C01595	HMDB00673	5280450	5533	279.3
8	1-docosahexaenoylglycerophosphocholine	1.27205	1.13969	1.28832	1.16355	0.974598	1.42594	1.06119	1.40223	0.887856	0.987364	0.953702						5518	568.4
280	sarcosine (N-Methylglycine)	1.04718	0.370953	1.02767	0.232792	1.00885	0.409075	0.995833	0.269131	0.894683	1.01899	0.958741			C00213	HMDB00271	10887311726	1182.9	116
54	2-oleoylglycerophosphoethanolamine*	1.16539	0.538392	1.1332	0.486539	0.99898	0.66103	1.00102	0.563419	0.909658	1.02841	0.960417						5848	478.3
61	3-(4-hydroxyphenyl)lactate	1.09845	0.396213	1.10345	0.339185	1.01288	0.50228	0.981194	0.48573	0.90273	0.995466	0.960417			C03672	HMDB00755	9378	1395	181.1
112	betaine	1.00602	0.12823	0.996671	0.17639	0.994213	0.112318	1.02214	0.244061	0.898423	1.00938	0.960417				HMDB00043	247	721	118.2
117	caprate (10:0)	0.997367	0.212476	1.00868	0.206733	1.01232	0.255239	0.99936	0.293472	0.905911	0.988783	0.960417			C01571	HMDB00511	2969	5092	171.2
182	histidine	0.995543	0.0942478	0.994515	0.142948	1.01987	0.128368	0.995929	0.220423	0.902166	1.00103	0.960417			C00135	HMDB00177	7733651426	757	154.1
297	taurolithocholate	1.29429	1.49791	1.74318	2.2637	1.11878	0.79986	0.951574	1.07448	0.917637	0.742488	0.960417			C02592	HMDB00722	10595	5328	482.4
298	tetradecanedioate	1.43169	1.08528	1.80343	2.16494	1.06917	1.40408	0.98847	1.16121	0.917637	0.79387	0.960417				HMDB00872	13185	5254	276
357	X-12051	1.66178	1.92743	1.46214	1.47549	1.14056	1.68282	0.936022	1.73963	0.910179	1.13654	0.960417						5739	456.4
405	X-15664	2.23072	5.13408	0.81501	0.672517	0.893791	1.32805	1.0499	1.29271	0.917637	2.73705	0.960417						3695	469.2
427	X-17147	1.10381	0.513887	1.26758	0.9692	0.999679	0.753691	1.00032	0.74947	0.913407	0.870798	0.960417						4830	187.2
22	1-palmitoylglycerophosphocholine	1.07494	0.68762	1.10451	0.671419	0.986199	1.16038	1.0138	1.18722	0.924666	0.973222	0.965523					86554	5671	496.4
135	cystine	1.0913	0.987439	1.00158	0.771655	0.997324	0.74082	1.00268	0.934558	0.928422	1.08958	0.967196			C00491	HMDB00192	595	2015.3	145.9
226	N-acetylphenylalanine	1.08341	0.461256	1.04748	0.341677	0.962987	0.517267	1.00602	0.35266	0.932573	1.0343	0.969271			C03519	HMDB00512	74839	2590	206.2
233	N-palmitoyl taurine	1.0525	0.510376	1.07846	0.608946	1.0015	0.625533	0.998498	0.672459	0.9397	0.975928	0.974424						5556.8	362.4
192	indolepropionate	2.07601	2.81099	3.6469	6.34807	1.03391	1.66932	0.868304	2.95921	0.947532	0.569252	0.978027				HMDB02302	3744	1925	202.1
326	X-11400	1.48727	1.56461	1.3739	1.4292	0.80628	1.09409	1.02083	1.42562	0.947532	1.08252	0.978027						2855	828.2
350	X-11909	1.08554	0.575728	1.0547	0.517396	0.999235	0.636016	1.00076	0.650177	0.950991	1.02924	0.979346						5272	297.3
209	mannose	1.0007	0.276193	1.03105	0.271368	1.02082	0.301053	0.968559	0.280881	0.954756	0.970566	0.980974			C00159	HMDB00169	161658	1753.5	203.9
423	X-16975	1.05375	0.546082	1.03032	0.591804	0.909022	0.826142	1.0049	0.658099	0.958523	1.02274	0.982596						2291.8	255.1
344	X-11727	1.00483	0.227754	1.00787	0.173649	0.991518	0.335146	1.03569	0.248658	0.962291	0.996979	0.984211						709	241
311	urea	1.00534	0.139813	1.00213	0.125943	1.00614	0.197661	0.99808	0.120752	0.966059	1.00321	0.98582			C00086	HMDB00294	117616150869	1223.9	171
149	eicosanodioate	1.01797	0.343759	1.01428	0.316065	1.00347	0.315926	0.993602	0.407129	0.969829	1.00363	0.987422					75502	5199.1	341.4
19	1-oleoylglycerophosphoethanolamine	1.11855	0.513159	1.10306	0.509142	0.964296	0.759337	1.02684	0.84518	0.977501	1.01404	0.99074				HMDB11506	9547071	5928	478.3
256	pentadecanoate (15:0)	1.06346	0.286362	1.12018	0.436337	1.00317	0.35272	0.996826	0.565084	0.977369	0.949366	0.99074			C16537	HMDB00826	13849	1853.5	299.2
18	1-oleoylglycerophosphocholine	1.38124	1.21521	1.26782	1.02605	0.923247	1.6988	1.16996	1.38633	0.988683	1.08946	0.99089					16081932	5700	522.4
167	glutarylcarnitine (C5)	0.995234	0.293206	0.946112	0.413511	0.976321	0.29931	1.03536	0.559956	0.984999	1.05192	0.99089				HMDB13130		1565	276.1
180	hexanoylcarnitine	1.02213	0.491115	1.09249	0.792672	1.01901	0.45864	0.978449	0.66759	0.984912	0.935596	0.99089			C01585	HMDB00705	6426853	3174	260.2
305	trigonelline (N'-methylnicotinate)	0.980563	0.294415	0.980891	0.361086	0.919029	0.335448	1.0215	0.470638	0.988683	0.999666	0.99089			C01004	HMDB00875	5570	757	138.1
322	X-11315	0.815215	0.498132	0.854889	0.407353	0.964441	0.595783	1.00194	0.382501	0.984912	0.953592	0.99089						1210	130.2
141	dihydroferulic acid	1.11992	1.03326	1.18338	1.08464	1.05178	1.23906	0.969993	1.80926	0.996228	0.946372	0.996228					14340	1929	195.1

## Sheet: Table 2
Clinicals	Mean small	SD small	Mean larger	SD larger	Median small	IQR small	Median larger	IQR larger	Wicoxon Pval	Padj (BH)
DEXA.Tissue	9135.12	2343.29	25392	3371.13	9225	2649	25052	5435.5	7.23586e-20	1.33863e-18
DEXA.Lean	6884.76	1799.19	17942.9	2910.15	6511	2725	17484	4199.5	7.23586e-20	1.33863e-18
DEXA.Bone.Mineral.Content	379.582	93.2543	1009.06	147.172	381	112.1	989.6	183.55	7.23586e-20	1.33863e-18
Pet.Weight	9344	2242.4	31500	9125.06	9190	2362.5	28900	13032	1.26e-14	1.05e-12
DEXA.Fat	2250.42	846.917	7449.06	2527.66	2157	964	7618	3063.5	1.96816e-17	2.91287e-16
DEXA.Total.Mass	9.51479	2.42988	26.401	3.47052	9.586	2.743	26.374	5.6	1.37556e-12	1.27239e-11
DEXA.Bone.Density	0.645242	0.0526177	0.779314	0.0519484	0.645	0.051	0.773	0.0565	3.73447e-11	3.07056e-10
Serum.Creatinine	0.644242	0.115678	0.862571	0.159694	0.66	0.14	0.84	0.27	1.16003e-07	7.80386e-07
Serum.CK	263.885	195.394	154.04	149.565	194.2	194.3	113.6	42.95	8.17683e-06	5.04238e-05
Serum.Potassium	4.30909	0.310608	4.65143	0.318426	4.3	0.5	4.6	0.45	0.000163849	0.000932678
Serum.Total.Bilirubin	0.101212	0.0437148	0.126571	0.0422836	0.09	0.03	0.13	0.055	0.00305462	0.0161458
Serum.AST	35.6788	11.5762	27.9057	7.4617	34.1	14.2	26.9	7.4	0.00356326	0.0175788
Serum.GGT	6.9303	2.52531	5.93714	2.5412	6.7	2.1	5.9	1.8	0.00595501	0.0244817
Serum.TAS	1.49394	0.15996	1.59714	0.12244	1.5	0.2	1.6	0.2	0.00833552	0.0308414
Serum.T3	1.0637	0.262099	0.935086	0.210769	1.06	0.308	0.901	0.265	0.0129528	0.0435687
DEXA.Tissue.Fat	24.5697	6.13828	29.1171	8.32115	24	7.6	29.3	12.45	0.0190826	0.0594876
DEXA.Region.Fat	23.5879	5.87366	28.0286	8.09366	23.1	7	28.1	12.05	0.0200449	0.0594876
CBC.Neutrophil..	64.0303	8.11051	60.0286	6.16196	64	13	58	8	0.0208313	0.0594876
CBC.Lymphocyte..	25.4242	7.39945	28.8571	5.48336	24	10	29	8.5	0.020901	0.0594876
Serum.ALT	40.7485	15.2103	47.9	17.7016	34.4	13.2	40.8	18.6	0.025928	0.0710618
Fecal.IgA	1.11896e+06	781885	810825	874466	1142249	1.16387e+06	442267	1.13551e+06	0.0364204	0.0898371
Fecal.IgE	634.436	263.253	757.72	208.733	456.134	502.065	841.199	438.365	0.0587698	0.140289
CBC.Bands..	3.42424	1.95305	4.37143	2.34001	3	2	4	2	0.074057	0.166067
Serum.Sodium	151.848	4.18421	150.086	4.8952	151	7	150	7.5	0.0916761	0.193829
Serum.Globulin	2.26364	0.517094	2.29143	0.268297	2.2	0.3	2.3	0.45	0.0911021	0.193829
Serum.LDH	191.382	169.01	120.58	63.302	115	177.7	106.9	80.4	0.119132	0.244881
Serum.Triglycerides	85.997	176.966	68.0143	37.5323	50.3	16	57.6	28.15	0.131207	0.262414
Serum.T4	1.67576	1.11131	1.77429	0.627011	1.5	1.1	1.9	0.95	0.14174	0.268942
Serum.Chloride	113.909	3.18555	112.714	3.86212	114	5	112	5	0.140413	0.268942
Serum.HDL...Cholesterol	165.727	26.9087	177.174	31.2809	164	38	174.8	34.85	0.148458	0.274647
CBC.HGB	16.0424	1.50977	16.5229	0.984911	16	1.7	16.4	1.35	0.152492	0.275229
CBC.RBC	6.5703	0.611123	6.78686	0.477615	6.56	0.74	6.72	0.6	0.169297	0.298284
Serum.Cholesterol	189.773	38.717	203.94	45.5405	185.6	51	197.4	52.75	0.187117	0.322016
CBC.HCT	44.0091	4.19601	45.1971	2.69373	44.4	3.8	44.8	3.1	0.19749	0.332142
Vit.D.1.25OH	127.821	26.9996	120.263	22.4009	129.1	37.2	114.2	19.25	0.222096	0.365224
Serum.LDL...Cholesterol	8.91212	6.65591	12.2429	10.8753	6.4	6	8.6	11.4	0.248667	0.383362
Serum.IgG	960.542	460.402	992.954	352.641	789.1	401.9	902.7	351.05	0.241246	0.383362
Serum.Alkaline.Phosphatase	49.5455	26.7344	72.6086	91.7547	41.1	21.3	46	16.75	0.243705	0.383362
Serum.Calcium	10.9727	0.630115	11.1543	0.538704	11	0.9	11.1	0.75	0.255593	0.385998
Serum.IgE	1.53939	2.19387	1.32	1.1248	0.6	1.1	0.9	1.5	0.334334	0.485112
CBC.MCHC	36.4636	0.512237	36.5657	0.589088	36.5	0.7	36.7	0.8	0.327921	0.485112
Serum.Insulin	174.061	86.4559	162.771	80.2995	159	73	145	90	0.390308	0.555438
CBC.WBC	6.9297	1.82595	6.65686	1.92498	6.68	2.69	6.14	2.2	0.417975	0.572781
Fecal.pH	5.9497	0.320366	5.92343	0.355113	5.95	0.38	5.86	0.55	0.491911	0.661843
Fecal.IgG	248542	213048	513862	1.09407e+06	261083	361873	243185	419844	0.533656	0.692817
CBC.Eosinophil..	6.75758	4.50715	6	3.75735	6	6	5	4.5	0.529089	0.692817
Serum.Glucose	89.8515	16.026	89.9114	7.44611	92.4	14.1	90.5	8.4	0.547624	0.698693
Serum.Total.Protein	6.12424	0.416106	6.16857	0.361997	6.1	0.3	6.1	0.65	0.675021	0.846637
Serum.Phosphorus	4.14848	0.651978	4.18857	0.515507	4.1	1.2	4.2	0.65	0.735265	0.864205
CBC.PLT	300.212	66.9929	290.657	66.2566	295	87	294	69	0.735742	0.864205
CBC.MCV	67.0424	3.48452	66.6857	2.47019	67.3	4.8	66.6	3.85	0.712737	0.864205
Vit.D.25OH	89.8909	26.4328	91.0314	39.4192	90.9	47.6	93.3	62.55	0.77304	0.893827
Serum.TSH	15.5455	5.23862	15.0571	4.89263	15	6	15	5.5	0.810271	0.908486
Serum.IgA	1.25053e+06	720050	1.28272e+06	724367	1.22994e+06	928822	1.18597e+06	921218	0.807377	0.908486
Serum.Albumin.Plus	3.86061	0.356142	3.87714	0.23274	3.9	0.4	3.9	0.3	0.824014	0.910105
Serum.Urea.Nitrogen	14.4667	2.77901	14.2143	2.06613	14.4	3.7	14.3	3.05	0.8443	0.918798
Serum.Apoliprotein.A	0.275758	0.0435194	0.277143	0.0426043	0.3	0	0.3	0	0.893719	0.939939
Serum.Parathormone	1.1	1.05238	0.917143	0.559141	0.8	0.8	0.8	0.6	0.901833	0.939939
Serum.Magnesium	2.05303	0.183226	2.04657	0.15746	2.06	0.25	2.05	0.22	0.955943	0.982497
CBC.MCH	24.4364	1.1163	24.3686	0.76841	24.2	1.8	24.4	0.9	0.980397	0.993827
Serum.Cortisol	1.77461	0.95263	1.90766	1.32533	1.61	0.97	1.44	1.04	1	1
Digestibility
	Small	Other	Small STD	Other STD	Adj P
Protein	88.0038	85.9935	2.21072	3.34508	0.01
Organic Matter	88.2583	87.3714	1.7685	2.0939	0.088
Energy	88.5042	87.6829	1.7848	2.0306	0.11
Dry Matter	85.4417	84.6829	2.0791	2.3321	0.196
CHO	90.3875	89.88	1.4125	1.891	0.221
Fiber	37.175	35.0571	8.8985	10.2795	0.408
Fat	93.3042	93.1286	1.2224	1.2246	0.645
Ash	45.8833	46.6771	8.275	8.1489	0.719

## Sheet: Table 3
Metabolite	Module assignement	Platform	Comp ID	KEGG	HMDB	PUBCHEM	Sub Pathway	Super Pathway	Mean small	SD small	Mean larger	SD larger	Median small	IQR small	Median larger	IQR larger	Wicoxon Pval	Padj (Benj. & Hoc.)	Ratio (small/larger)
1,5-anhydroglucitol (1,5-AG)	blue	GC/MS	20675	C07326	HMDB02712		Glycolysis, gluconeogenesis, pyruvate metabolism	Carbohydrate	1.06168	0.312234	0.982012	0.364467	1.02124	0.472967	0.997425	0.537461	0.361513	0.617184	1.08113
1-methylhistidine	blue	GC/MS	30460	C01152	HMDB00001	921057020397	Histidine metabolism	Amino acid	0.943022	0.552775	1.11115	0.381859	0.776917	0.50439	1.09031	0.42816	0.0145122	0.0835383	0.848689
2-aminobutyrate	blue	LC/MS pos	32348	C02261	HMDB00650	4396916971251	Butanoate metabolism	Amino acid	1.08345	0.242207	1.03332	0.439999	1.08263	0.368179	0.920512	0.540676	0.130297	0.344138	1.04851
2-hydroxyglutarate	blue	GC/MS	37253	C02630	HMDB00606	43	Fatty acid, dicarboxylate	Lipid	1.32916	0.826486	0.953775	0.396688	1.24489	0.716151	0.90791	0.41209	0.0244412	0.129107	1.39358
2-hydroxyisobutyrate	blue	GC/MS	22030		HMDB00729	11671	Chemical	Xenobiotics	1.11202	0.329896	1.11434	0.594242	1.03956	0.307556	0.971146	0.474886	0.235344	0.496101	0.997913
3-(4-hydroxyphenyl)lactate (HPLA)	blue	LC/MS neg	32197	C03672	HMDB00755	9378	Phenylalanine & tyrosine metabolism	Amino acid	1.09845	0.396213	1.10345	0.339185	1.01288	0.50228	0.981194	0.48573	0.90273	0.960417	0.995466
3-aminoisobutyrate	blue	GC/MS	1566	C05145	HMDB03911	64956	Pyrimidine metabolism, thymine containing; Valine, leucine and isoleucine metabolism/	Nucleotide	0.784788	0.799237	1.06932	0.822989	0.753578	1.14896	1.07997	1.57031	0.0250627	0.130737	0.73391
3-methylhistidine	blue	LC/MS neg	15677	C01152	HMDB00479	649696971061	Histidine metabolism	Amino acid	1.22448	0.765894	1.09128	0.459401	0.922102	0.56304	1.00334	0.304108	0.708773	0.874283	1.12206
3-ureidopropionate	blue	LC/MS pos	3155	C02642	HMDB00026	111	Alanine and aspartate metabolism	Amino acid	1.0533	0.659891	1.16153	0.462144	0.912948	0.609577	1.08415	0.528506	0.125561	0.338708	0.906819
4-hydroxymandelate	blue	GC/MS	1568	C03198	HMDB00822	328	Benzoate metabolism	Xenobiotics	1.02946	0.248712	0.978942	0.307514	1.0404	0.268635	0.929628	0.358114	0.116493	0.327	1.05161
5-methyl-2'-deoxycytidine	blue	LC/MS pos	38159	C03592		440055	Pyrimidine metabolism, cytidine containing	Nucleotide	1.1138	0.30046	0.984961	0.262483	1.03711	0.371323	0.963268	0.362759	0.0810549	0.269583	1.13081
allantoin	blue	GC/MS	1107	C02350	HMDB00462	204	Purine metabolism, urate metabolism	Nucleotide	1.0056	0.223737	1.0782	0.220967	0.960509	0.311548	1.05852	0.260536	0.116882	0.327	0.932667
alpha-hydroxyisovalerate	blue	GC/MS	33937		HMDB00407	99823	Valine, leucine and isoleucine metabolism	Amino acid	0.951984	0.579572	1.14766	0.562838	0.799683	0.485174	1.03372	0.52869	0.0425325	0.183767	0.8295
anserine	blue	LC/MS neg	15747	C01262	HMDB00194	6992114112072	Dipeptide derivative	Peptide	1.10255	0.327524	0.995207	0.251419	1.06297	0.404795	0.997965	0.287437	0.0906218	0.288576	1.10786
arabitol	blue	GC/MS	38075	C00474	HMDB01851	94154	Nucleotide sugars, pentose metabolism	Carbohydrate	0.964204	0.397516	1.14319	0.378297	0.923535	0.464898	1.02658	0.58698	0.0533915	0.217934	0.843431
arachidonate (20:4n6)	blue	LC/MS neg	1110	C00219	HMDB01043	444899	Long chain fatty acid	Lipid	1.02193	0.222102	1.00761	0.266285	1.00287	0.300623	0.995854	0.237459	0.691261	0.86658	1.01421
campesterol	blue	GC/MS	39511	C01789	HMDB02869	173183	Sterol/Steroid	Lipid	1.03512	0.590271	0.974898	0.758049	1.03099	0.676579	0.892156	1.57356	0.756345	0.883192	1.06177
carnitine	blue	LC/MS pos	15500	C00318		10917	Carnitine metabolism	Lipid	0.988321	0.240052	0.955268	0.265684	1.03059	0.332097	0.96288	0.351964	0.729991	0.882568	1.0346
carnosine	blue	LC/MS neg	1768	C00386	HMDB00033	4392246992100	Dipeptide derivative	Peptide	1.00398	0.175094	1.01373	0.140606	0.995496	0.237646	1.0045	0.177343	0.715822	0.87576	0.990387
C-glycosyltryptophan*	blue	LC/MS pos	32675				Tryptophan metabolism	Amino acid	0.861373	0.229649	1.09148	0.22279	0.79573	0.349413	1.06709	0.275378	4.14768e-05	0.000931154	0.78918
cholesterol	blue	GC/MS	63	C00187	HMDB00067	6432564	Sterol/Steroid	Lipid	0.970481	0.154119	1.05977	0.20153	0.974437	0.158287	1.03352	0.179445	0.0145122	0.0835383	0.915743
cis-aconitate	blue	LC/MS pos	12025	C00417	HMDB00072	643757	Krebs cycle	Energy	1.09244	0.424182	0.997403	0.317531	1.00429	0.521907	0.995712	0.340031	0.457917	0.704126	1.09528
citrate	blue	GC/MS	1564	C00158	HMDB00094	311	Krebs cycle	Energy	1.06046	0.241979	1.01078	0.219443	1.05683	0.269386	0.977682	0.230895	0.217209	0.47425	1.04915
citrulline	blue	LC/MS pos	2132	C00327	HMDB00904	833	Urea cycle; arginine-, proline-, metabolism	Amino acid	1.20334	0.284205	0.991687	0.412477	1.20063	0.513397	0.852166	0.503313	0.000934511	0.0101604	1.21343
creatinine	blue	LC/MS pos	513	C00791	HMDB00562	588	Creatine metabolism	Amino acid	0.88416	0.109892	1.13649	0.173186	0.891602	0.142594	1.11548	0.242395	1.09936e-09	2.46807e-07	0.777975
cytidine	blue	LC/MS pos	514	C00475	HMDB00089	6175	Pyrimidine metabolism, cytidine containing	Nucleotide	1.0907	0.324016	1.03547	0.330009	0.992562	0.311714	1.00744	0.527492	0.508031	0.740603	1.05334
dihydrocholesterol	blue	GC/MS	21131		HMDB00908	6665	Sterol/Steroid	Lipid	0.840742	0.591892	0.941234	0.5746	0.893952	0.520809	1.08933	0.612959	0.199636	0.458395	0.893233
dimethylarginine (ADMA + SDMA)	blue	LC/MS pos	36808	C03626	HMDB01539 HMDB03334	123831	Urea cycle; arginine-, proline-, metabolism	Amino acid	1.02121	0.210462	1.04344	0.217471	0.946669	0.226173	1.04797	0.282178	0.266159	0.523251	0.978693
erythritol	blue	GC/MS	20699	C00503	HMDB02994		Sugar, sugar substitute, starch	Xenobiotics	0.945929	0.196588	1.0935	0.236443	0.925832	0.268458	1.07573	0.359447	0.00543573	0.0400106	0.865051
erythronate	blue	GC/MS	33477		HMDB00613	2781043	Aminosugars metabolism	Carbohydrate	1.01851	0.235754	1.02649	0.219622	0.931797	0.226867	1.00007	0.298132	0.756345	0.883192	0.992231
fructose	blue	GC/MS	577	C00095	HMDB00660	5984	Fructose, mannose, galactose, starch, and sucrose metabolism	Carbohydrate	1.0604	0.372117	1.07465	0.391276	0.997847	0.258973	1.00215	0.413174	0.876017	0.945508	0.986747
glycerophosphorylcholine (GPC)	blue	LC/MS pos	15990	C00670	HMDB00086	657272	Glycerolipid metabolism	Lipid	0.980458	0.223163	1.10719	0.31561	0.950255	0.268591	1.00837	0.247306	0.0746806	0.257935	0.885538
homocitrulline	blue	LC/MS pos	22138	C02427	HMDB00679	650726991977	Urea cycle; arginine-, proline-, metabolism	Amino acid	0.887173	0.349523	1.15679	0.406608	0.891098	0.507178	1.23079	0.572151	0.00276462	0.0243395	0.766926
imidazole propionate	blue	LC/MS pos	40730		HMDB02271	70630	Histidine metabolism	Amino acid	0.984902	0.393348	1.05963	0.42407	0.958747	0.601815	1.00984	0.388811	0.440915	0.692206	0.929477
malate	blue	GC/MS	1303	C00149	HMDB00156	525	Krebs cycle	Energy	1.15022	0.417044	0.955407	0.316786	1.06353	0.473614	0.952769	0.33284	0.0425325	0.183767	1.20391
mannitol	blue	GC/MS	15335	C00392	HMDB00765	6251	Fructose, mannose, galactose, starch, and sucrose metabolism	Carbohydrate	0.566336	0.663463	1.69186	2.67473	0.0319868	0.994102	1.30494	0.927574	0.00032064	0.00464411	0.334742
N2,N2-dimethylguanosine	blue	LC/MS pos	35137		HMDB04824	92919	Purine metabolism, guanine containing	Nucleotide	0.958066	0.174275	1.00769	0.166284	0.950962	0.213168	1.05204	0.248546	0.10589	0.31075	0.950752
N6-carbamoylthreonyladenosine	blue	LC/MS pos	35157				Purine metabolism, guanine containing	Nucleotide	0.924702	0.167822	1.05989	0.182931	0.918206	0.208085	1.03286	0.239699	0.000528278	0.00647566	0.872449
N-acetylaspartate (NAA)	blue	GC/MS	22185	C01042	HMDB00812	65065	Alanine and aspartate metabolism	Amino acid	1.21346	0.53391	0.981543	0.540733	1.10074	0.42385	0.958578	0.419608	0.0707644	0.252683	1.23628
N-acetyl-beta-alanine	blue	LC/MS pos	37432	C01073		76406	Alanine and aspartate metabolism	Amino acid	1.02096	0.322218	1.07701	0.322616	0.923076	0.560049	1.07272	0.500745	0.413398	0.672521	0.947955
N-acetylglutamine	blue	LC/MS pos	33943	C02716	HMDB06029	182230	Glutamate metabolism	Amino acid	1.00139	0.288958	1.00794	0.27438	0.97071	0.264324	1	0.281321	0.639734	0.830182	0.993501
N-acetylisoleucine	blue	LC/MS pos	33967			2802421	Valine, leucine and isoleucine metabolism	Amino acid	1.08661	0.414224	1.01365	0.446633	1.07081	0.555862	0.980479	0.51258	0.429165	0.68919	1.07199
N-acetylleucine	blue	LC/MS pos	1587	C02710	HMDB11756	70912	Valine, leucine and isoleucine metabolism	Amino acid	1.13422	0.441372	1.01642	0.4394	1.11004	0.457869	0.939114	0.693969	0.266159	0.523251	1.11589
N-acetylornithine	blue	LC/MS pos	15630	C00437	HMDB03357	6992102439232	Urea cycle; arginine-, proline-, metabolism	Amino acid	0.963837	0.217715	1.10147	0.355187	0.981675	0.298266	1.00333	0.531864	0.119831	0.328075	0.875049
N-acetylphenylalanine	blue	LC/MS neg	33950	C03519	HMDB00512	74839	Phenylalanine & tyrosine metabolism	Amino acid	1.08341	0.461256	1.04748	0.341677	0.962987	0.517267	1.00602	0.35266	0.932573	0.969271	1.0343
N-acetyltryptophan	blue	LC/MS neg	33959	C03137		700653	Tryptophan metabolism	Amino acid	1.24268	0.527984	1.00159	0.390447	1.12484	0.749461	0.954587	0.469424	0.0411063	0.18274	1.24071
N-acetyltyrosine	blue	LC/MS neg	32390		HMDB00866	68310	Phenylalanine & tyrosine metabolism	Amino acid	1.15599	0.498411	1.00236	0.340442	1.03426	0.709745	0.976637	0.285566	0.341955	0.595108	1.15327
N-acetylvaline	blue	LC/MS pos	1591		HMDB11757	66789	Valine, leucine and isoleucine metabolism	Amino acid	0.969291	0.283666	1.05138	0.329197	0.92051	0.37395	1.01235	0.432465	0.287429	0.537731	0.921924
palmitoyl sphingomyelin	blue	GC/MS	37506			9939941	Sphingolipid	Lipid	0.930255	0.226626	1.11042	0.289364	0.921082	0.215783	1.10579	0.363362	0.0040266	0.0317183	0.837753
pantothenate (Vitamin B5)	blue	LC/MS pos	1508	C00864	HMDB00210	6613	Pantothenate and CoA metabolism	Cofactors and vitamins	1.30443	0.475213	0.990818	0.54289	1.10786	0.705835	0.784311	0.433222	0.000548052	0.00647566	1.31652
pseudouridine	blue	LC/MS neg	33442	C02067	HMDB00767		Pyrimidine metabolism, uracil containing	Nucleotide	0.927171	0.127003	1.04099	0.142917	0.922188	0.131979	1.04071	0.149858	1.87941e-05	0.000496385	0.890659
pyridoxate	blue	LC/MS neg	31555	C00847	HMDB00017	6723	Vitamin B6 metabolism	Cofactors and vitamins	0.927333	0.444124	1.00668	0.474101	0.990875	0.410213	1.02716	0.370997	0.402683	0.664723	0.921181
quinate	blue	GC/MS	18335	C00296	HMDB03072		Food component/Plant	Xenobiotics	1.02319	1.34382	1.05577	0.773596	0.990242	1.34638	1.00976	0.773907	0.407462	0.667703	0.969141
ribitol	blue	GC/MS	15772	C00474	HMDB00508		Nucleotide sugars, pentose metabolism	Carbohydrate	0.902673	0.373151	1.05638	0.300153	0.958492	0.4695	1.02668	0.32334	0.0785615	0.265219	0.854494
riboflavin (Vitamin B2)	blue	LC/MS pos	1827	C00255	HMDB00244	493570	Riboflavin metabolism	Cofactors and vitamins	1.14768	0.528367	0.968507	0.505557	0.986841	0.59187	1.01316	0.536239	0.337173	0.591371	1.185
sorbitol	blue	GC/MS	15053	C00794	HMDB00247	107428	Fructose, mannose, galactose, starch, and sucrose metabolism	Carbohydrate	0.651159	0.514397	0.952533	0.446388	0.75495	1.04627	1.03645	0.389183	0.00984865	0.0622823	0.683608
sphingomyelin	blue								0.919103	0.232764	1.05854	0.280526	0.871215	0.319956	1.03601	0.394256	0.0253321	0.130737	0.868276
sphingosine	blue	LC/MS pos	17747	C00319	HMDB00252	5353955	Sphingolipid	Lipid	1.07636	0.65604	1.02317	0.801261	1.02028	0.650012	0.990612	0.979104	0.559737	0.773298	1.05198
S-propylcysteine	blue	LC/MS pos	40648			125198	Cysteine, methionine, SAM, taurine metabolism	Amino acid	1.14645	0.615297	0.999069	0.539915	1.28317	0.716277	0.930325	0.47969	0.097016	0.298357	1.14752
thymol sulfate	blue	LC/MS neg	36095	C09908	HMDB01878		Food component/Plant	Xenobiotics	1.28372	1.03891	0.789688	0.696114	1.18957	1.07709	0.840557	1.04411	0.0101313	0.0631798	1.6256
urea	blue	GC/MS	1670	C00086	HMDB00294	117616150869	Urea cycle; arginine-, proline-, metabolism	Amino acid	1.00534	0.139813	1.00213	0.125943	1.00614	0.197661	0.99808	0.120752	0.966059	0.98582	1.00321
valerate (5:0)	blue	LC/MS neg	33443	C00803	HMDB00892	7991	Short chain fatty acid	Lipid	1.01874	0.50981	0.915914	0.469491	1.10883	0.474659	0.970926	0.380466	0.240988	0.503273	1.11226
X - 11334	blue								0.666537	0.611682	1.41347	0.775886	0.62144	0.958472	1.17182	0.681827	2.92667e-06	0.000119461	0.47156
X - 11429	blue								0.978143	0.202974	1.02525	0.392789	0.909445	0.248039	1.0319	0.383333	0.126733	0.338708	0.954054
X - 11561	blue								1.12869	1.09053	1.14488	0.472078	0.864663	0.840973	1.06337	0.610331	0.0753636	0.258307	0.985865
X - 11662	blue								1.59776	1.06963	1.11244	0.622445	1.12581	1.40528	0.951797	0.732816	0.0827157	0.27109	1.43627
X - 11727	blue								1.00483	0.227754	1.00787	0.173649	0.991518	0.335146	1.03569	0.248658	0.962291	0.984211	0.996979
X - 11945	blue								0.99472	0.197062	1.03377	0.209824	1	0.288693	1.00266	0.236871	0.429784	0.68919	0.962223
X - 11987	blue								1.14899	0.635219	1.00858	0.739129	1.18113	0.916981	0.907342	0.849351	0.164527	0.41171	1.13922
X - 12161	blue								0.901267	0.292069	1.09714	0.340114	0.922472	0.347609	1.04146	0.376999	0.0202631	0.112323	0.821466
X - 12355	blue								1.36119	0.814279	0.942401	0.504829	1.14878	1.13116	0.886178	0.498223	0.0207785	0.113775	1.44439
X - 12602	blue								1.19204	0.496074	0.935582	0.341341	1.14656	0.67149	0.941017	0.434132	0.0322143	0.150669	1.27412
X - 12729	blue								1.7149	1.60391	2.87015	4.14653	1.08183	1.10684	0.717117	2.96625	0.31352	0.567623	0.597494
X - 13835	blue								1.41568	1.18903	1.00247	0.342762	1.0655	1.11847	0.98145	0.46688	0.712294	0.87576	1.41219
X - 16982	blue								1.03701	0.35431	1.04071	0.334681	0.978291	0.52278	1.00667	0.35944	0.876017	0.945508	0.996441
X - 17010	blue								1.00193	0.25153	1.07602	0.367095	0.945776	0.292512	1.06637	0.458919	0.161675	0.411406	0.931139
X - 18156	blue								0.851425	0.355081	1.07297	0.253662	0.780862	0.563662	1.06924	0.33543	0.0039263	0.0314805	0.793519
X - 18487	blue								0.719072	0.421675	1.49325	0.832508	0.676002	0.485842	1.27541	0.698272	6.02083e-08	5.4067e-06	0.481548
xanthine	blue	GC/MS	3147	C00385	HMDB00292	1188	Purine metabolism, (hypo)xanthine/inosine containing	Nucleotide	1.04157	0.929362	1.56817	1.71031	0.74153	1.4438	1.12531	1.09645	0.177317	0.429271	0.664191
xylitol	blue	GC/MS	41319	C00379	HMDB00568	6912	Nucleotide sugars, pentose metabolism	Carbohydrate	0.875459	0.37863	1.17291	0.464702	0.79018	0.381001	1.08599	0.505875	0.00141616	0.0138229	0.746399

## Sheet: Table 4
Entities and Relationship	RelationNumberOfReferences	MedLine Reference
fructose ---> kidney blood flow	1	32407627
fructose ---> renin-angiotensin system	1	32407627
carnosine --+> kidney function	1	28149008:6
creatinine ---> kidney excretion	7	16980071:1014;11297601:1178;10657393:1056;9814488:1048;9853288:1056;20607610:10098;1720640:2;9814488:8
citrulline ---| kidney blood flow	1	100042028:10496
carnosine ---> kidney function	6	12921872:1067;15878720:1080;16916994:1157;25474013:10449;20518851:100;28149008:6
cholesterol ---| renal clearance	2	22576734:10107
cholesterol ---| kidney blood flow	2	19776170:1033;19776170:1201;22909784:10222
fructose --+> kidney excretion	2	22014632:1091;19095201:1042
creatinine ---> kidney filtration	18	15234231:1055;19577115:1044;10371963:1027;22310573:1059;100287273:1144;22440551:1144;26003521:1096;18653826:1179;19535424:1182;18180701:1120;14747387:1117;22721504:10011;20804597:10248;24066011:10229;100067767:10123;21190081:0;27499007:1093;26519480:10403
creatinine ---> kidney function	180	17540211:1113;20598983:1076;17322384:1154;15619503:1018;12440642:1009;17113060:1009;18573244:1070;19660251:1010;20412947:1014;10647652:1113;17222613:1103;15755460:1084;19323971:1093;19789028:1136;16387094:1065;18089410:1008;19249501:1033;21911162:1022;100203848:1024;15811456:1009;21334736:1131;100217561:1178;16015228:1044;17566573:1001;17045114:1100;100278994:1140;18061846:1008;100285448:1451;104…
urea ---> kidney development	1	8587624:100
creatinine ---> glomerular filtration rate	331	18096462:1112;18096462:1164;100002318:1006;100003202:1001;100027310:1014;12559595:1099;17113060:1110;17157286:1005;17208211:1021;19766615:1019;20350654:1004;16165140:1012;21882396:1933;21723445:1933;100129107:1080;100133903:1011;100133903:1023;15755462:1073;14564676:1105;18089366:1038;18261556:1041;21168715:1128;16026817:1010;17572186:1057;19041887:1099;18992617:1075;21704236:1006;17658635:1005;1…
citrate ---> kidney filtration	1	23036243:1217
creatinine --+> renal tubular secretion	1	27461168:1113
arachidonic acid --+> renin-angiotensin system	1	21658925:1089
sorbitol --+> kidney excretion	1	2752208:7
mannitol --+> renal clearance	4	22303918:10355;9754609:5;10332179:6;2513154:0
urea ---| kidney elimination	1	25577974:1109
1,5-anhydroglucitol ---| kidney excretion	1	24559582:1066
ribitol --+> kidney excretion	1	27259054:10
creatinine --+> kidney tubule function	1	27245055:4
urea ---| kidney function	23	12691796:1044;20036491:1010;100405915:1017;12407634:1084;12407634:1087;25037561:1003;10995747:1202;23144764:10040;21880973:10079;21880973:10103;14304256:2;712337:100;7115354:100;2776204:3;1499602:8;8476893:5;9171961:9;11437031:8;15625779:4;20369724:18;27034701:10481;27296531:1123;100000244:1149;27683439:0;27866048:1013
urea ---> renal water reabsorption	1	25095973:2
urea ---| kidney filtration	2	22169772:1207;25688861:10423
cholesterol ---> kidney function	14	21868047:1149;17766000:1007;16297505:1090;19217521:1015;15539326:1085;12148105:1005;10405198:1053;21041305:10487;23238665:10053;1770020:5;9306342:8;10405198:12;14759090:9;20422375:8;23758574:8
xanthine ---| kidney function	2	12680841:7;100000404:1071
fructose ---> kidney vascularization	1	22547437:10021
mannitol --+> kidney excretion	4	24120076:1104;24120076:1105;16707393:1059;16707389:1059;22717322:7
citrulline ---| kidney excretion	1	19744750:1122
fructose --+> renin-angiotensin system	8	17449556:1188;17449556:1219;20882287:10029;20705709:10035;24760443:10088;2527043:100;8842564:10;26607702:11;27462279:8
N-acetylornithine ---| glomerular filtration rate	1	23453801:1359
creatinine ---| renal clearance	12	12697375:1102;9580760:1096;100442845:1109;22108572:1109;26119486:1035;18577565:1060;11733540:1168;11733540:1383;20567810:10362;11186701:8;100516275:1081;17200156:1138;21270793:10009
carnosine ---| glomerular filtration rate	1	21573905:10322
citrate --+> glomerular filtration rate	5	11044205:1033;11901070:1084;3997374:5;9644634:10;11044205:8;16014041:6
cholesterol ---> glomerular filtration rate	42	18359317:1073;16956602:1058;22037512:1040;19410683:1083;15754270:1074;18423813:1073;18706747:1041;20621247:1022;21492764:1057;11728976:1068;23195014:1058;23489551:1050;100748675:1011;25526878:1011;25891691:1059;26145254:1046;26145254:1062;26145254:1114;25708553:1056;20357380:1143;12427147:1037;19776170:1033;22290079:10062;23714680:10130;23714680:10203;23714680:10385;23714680:10430;22931970:10293;…
pseudouridine --+> renal reabsorption	1	9607216:1138
arabitol --+> kidney excretion	1	27259054:10
fructose ---| renal acidification	1	5658593:2
riboflavin --+> kidney excretion	5	15081141:1141;21249436:10160;100018522:10132;3104896:1;14602420:5
thymol ---> kidney function	2	100035096:10024;25487789:3
1,5-anhydroglucitol ---| kidney function	1	1630543:1
creatinine ---> kidney blood flow	6	17765040:1041;19805915:1172;21909828:10118;100065723:10102;21169816:6;27427971:10240
urea ---> kidney function	1	27866048:1013
carnosine --+> kidney excretion	1	24456906:1178
cholesterol --+> kidney excretion	2	21041305:10485;16036490:6
urea --+> renal reabsorption	2	100000359:1083;28087157:1083
citrate ---> kidney development	3	17715401:1052;10966927:1038;10966927:0;19918339:0
mannitol --+> kidney filtration	2	24946698:1141;25043142:10152
citrate --+> kidney function	7	18359396:1065;11380803:1584;11044205:1324;21656026:10101;9644634:100;18019214:4;20958145:100
cholesterol --+> renin-angiotensin system	1	100000443:1026
arachidonic acid ---| glomerular filtration rate	1	22809843:3
mannitol --+> kidney blood flow	17	100284401:1044;21782075:1190;19041543:1017;23726579:1080;100877435:1105;15272017:1316;17218591:1122;16269600:1193;10906171:1230;22901953:10356;22901953:10359;22901953:10452;22901953:10468;22901953:10471;22901953:10473;23849270:10360;24267346:10015;25043142:10152;481662:1;513486:5;16579767:10;22901953:100;22901953:16;26823282:10292
urea ---| renal clearance	4	20494176:1154;24518388:1145;14602758:1054;21612743:10224
citrate ---> kidney excretion	4	16632016:1100;15953764:1031;11322172:13;25341358:2
urea ---> kidney excretion	1	16716621:1009
cis-aconitate --+> glomerular filtration rate	1	20613759:10418
xanthine --+> kidney excretion	1	16324927:1002
allantoin --+> kidney excretion	1	16899691:1075
xanthine --+> glomerular filtration rate	1	9101506:3
citrulline --+> kidney function	1	23362955:6
mannitol --+> renin-angiotensin system	1	15272017:1316
pantothenic acid ---| kidney excretion	2	21733331:4;24477247:100
creatinine ---> kidney tubule function	3	23414827:1210;15128879:10;27245055:4
mannitol --+> glomerular filtration rate	16	11247599:1019;100171561:1032;7498961:1078;18268476:1211;16269600:1193;10906171:1230;22901953:10014;22901953:10361;22901953:10458;23514538:10259;23909252:10164;23514538:10260;1155614:2;481662:5;6771201:2;6166263:1;6436720:7;8610896:5;8610896:6;18612627:12;22901953:3
riboflavin ---> renal clearance	1	16343829:1014
creatinine ---| renin-angiotensin system	4	22133132:1036;19195602:1019;100566808:1145;23128144:9
fructose ---> kidney function	7	12489065:10;17207869:8;23235337:100;26327248:1208;26623925:4;26770008:10415;27125390:5;27125390:10251;26623925:10006
urea --+> kidney blood flow	1	18037357:1100
arachidonic acid --+> renal vasodilatation	2	16490839:1065;3126011:3;3126011:4;3126011:9
mannitol ---| renal reabsorption	1	11779027:1062
cholestanol --+> kidney excretion	1	24442603:10023
arachidonic acid ---> kidney function	5	10493105:1014;14978252:1300;9722531:1036;11882623:1126;26045535:10142
erythritol --+> kidney excretion	2	8933645:16;27259054:10
cholesterol --+> kidney filtration	1	19241136:10027
arachidonic acid --+> kidney blood flow	2	6275455:2;3937925:3
arachidonic acid ---> kidney tubule function	2	17123563:1097;17112342:1022;17112342:0
cholesterol ---> renin-angiotensin system	6	21297254:10034;21297254:10447;21628469:10038;23378623:10082;22227126:10104;22236548:7;100000443:1026
citrate --+> renal reabsorption	1	22739534:10054
mannitol ---> kidney function	9	20359588:2588;20233780:3232;21873958:10349;20664093:11694;4806000:100;7671564:4;8927146:3;12074531:10;26124666:4
fructose ---> kidney blood flow	3	18216151:1086;23344470:10374;21115612:10095
fructose ---| kidney filtration	1	21523663:100
urea ---> glomerular filtration rate	37	21763304:1114;100133903:1023;100408249:1135;100408249:1205;100494438:1162;100542201:1012;24220764:1052;25064377:1014;26003607:1031;25640527:1153;100044838:1174;10676731:1027;100655831:1034;23871366:1167;23871366:1168;100877431:1021;12446500:1063;8941641:1132;10744621:1087;12909709:1110;11441026:1173;16849692:1275;8989270:1151;23037160:10036;22456603:10190;23526187:10233;23028946:10103;24231664:10…
citrulline ---| glomerular filtration rate	3	100285277:1028;11576927:1028;100042028:10073

## Sheet: Table 5
Entities and Relationship	Relation # References	MedLine Reference
ALB ---> kidney function	1	32288663
creatinine ---> kidney excretion	7	16980071:1014;11297601:1178;10657393:1056;9814488:1048;9853288:1056;20607610:10098;1720640:2;9814488:8
glucose --+> kidney vascularization	2	16978905:1610;17287426:1236
Ca2+ --+> kidney development	11	19331813:1091;100164914:1036;22480460:1036;7843770:1187;23525114:10043;23525114:10355;3732972:9;3755776:0;3755776:7;3039478:0;2024683:5;26398287:10018;26398287:1;27838230:1230
glucose ---> kidney function	34	21839260:1007;18519091:1090;100285166:1117;21146638:1150;100600953:1110;19703681:1041;22813566:1110;23993260:1093;14981601:1117;18339714:1039;12019204:1200;12019204:1201;11918750:1168;12397051:1117;20670414:10487;20804597:10049;21253582:10225;22210564:10014;21235803:10577;21926943:10200;24358344:10429;24646643:10136;23486012:10705;23486012:10718;20639674:10144;7432841:100;15189820:13;18339714:1;1…
glucose --+> kidney tubule function	4	24107418:10214;2025544:9;20890878:1;25222109:2
ALB ---| renal reabsorption	14	18508156:1134;20138413:1122;100305719:1177;19324088:1229;12073198:1054;25288534:1145;19812175:1237;18703613:1059;18703613:1060;18703613:1079;18703613:1161;18703613:1163;18703613:1168;18703613:1169;18703613:1177;18703613:1186;18703613:1192;21204764:10367;23537514:10393;21868498:10167;23528382:10224;2776330:3;18703613:8;18703613:9;18703613:10;22423488:3
creatinine ---> kidney filtration	18	15234231:1055;19577115:1044;10371963:1027;22310573:1059;100287273:1144;22440551:1144;26003521:1096;18653826:1179;19535424:1182;18180701:1120;14747387:1117;22721504:10011;20804597:10248;24066011:10229;100067767:10123;21190081:0;27499007:1093;26519480:10403
creatinine ---> kidney function	180	17540211:1113;20598983:1076;17322384:1154;15619503:1018;12440642:1009;17113060:1009;18573244:1070;19660251:1010;20412947:1014;10647652:1113;17222613:1103;15755460:1084;19323971:1093;19789028:1136;16387094:1065;18089410:1008;19249501:1033;21911162:1022;100203848:1024;15811456:1009;21334736:1131;100217561:1178;16015228:1044;17566573:1001;17045114:1100;100278994:1140;18061846:1008;100285448:1451;104…
HDL ---> renal reabsorption	1	14711371:100
LDL --+> renin-angiotensin system	5	23357151:1011;12837686:1222;22493418:10016;23997101:10524;17992634:100;17992634:6
bilirubin --+> kidney function	6	15561977:1052;15561977:1244;22074434:10400;23989367:10001;23989367:10006;25810564:10333;24761005:10437;15561977:8;26498893:100
Ca2+ ---> kidney excretion	34	16580279:1023;12559595:1104;10751889:1008;10751889:1074;21575973:1100;15780355:1055;17678980:1060;18519090:1023;22001499:1098;12380374:1076;14670550:1109;18947655:1002;22578827:1076;22776717:1013;17062884:1142;11134095:1139;9989691:1139;12372764:1263;21698557:10083;20847091:10027;23977367:10357;23880796:10040;25339697:10693;23334694:10455;3104896:1;2093030:1;8305167:5;9050237:6;9179543:100;127000…
ALB ---| kidney excretion	1	27096762:10063
urea ---| kidney elimination	1	25577974:1109
creatinine --+> kidney tubule function	1	27245055:4
urea ---| kidney function	23	12691796:1044;20036491:1010;100405915:1017;12407634:1084;12407634:1087;25037561:1003;10995747:1202;23144764:10040;21880973:10079;21880973:10103;14304256:2;712337:100;7115354:100;2776204:3;1499602:8;8476893:5;9171961:9;11437031:8;15625779:4;20369724:18;27034701:10481;27296531:1123;100000244:1149;27683439:0;27866048:1013
glucose --+> renin-angiotensin system	77	18374681:1040;17600118:1151;15922295:1082;19712706:1004;21719174:1037;12890592:1110;17509892:1097;21129996:1076;23376562:1150;23384600:1173;23374891:1120;23313806:1021;23528476:1133;23665496:1100;23973482:1024;24119849:1084;24119849:1085;24462787:1196;24731445:1023;24731445:1108;25261156:1084;100813454:1019;100813454:1093;100813454:1099;25801006:1006;100838713:1004;25542307:1003;25542307:1013;255…
ALB --+> kidney function	92	100051176:1012;19631603:1000;18570945:1071;21872093:1136;21600934:1001;10905585:1009;15336440:1121;17560680:1100;100286052:1020;100488140:1149;100488158:1158;16971267:1073;16971267:1082;100488377:1219;15381144:1045;100515324:1092;19653434:1015;21925404:1100;17223500:1123;19686867:1098;21145427:1059;100594295:1092;22465201:1012;22541704:1219;11179247:1446;25217271:1121;10213663:1019;100793261:1076…
urea ---> renal water reabsorption	1	25095973:2
bilirubin ---| kidney excretion	1	12167493:4
Ca2+ ---> kidney vascularization	3	19439521:1224;847743:7;1789949:5
urea ---| kidney filtration	2	22169772:1207;25688861:10423
LDL ---> kidney blood flow	2	24934117:10222;9016859:0
Ca2+ ---> renal clearance	3	1136597:2;3443063:0;11186701:8
triiodothyronine --+> kidney filtration	1	10638678:11
ALB ---| renal clearance	14	21237153:1052;9802246:1276;20005262:1013;15589066:1023;23743288:1103;19900495:1137;25768886:1074;11856788:1138;100071906:10091;2792172:4;1793861:1;3367558:100;3367558:7;14990335:9;26340816:1016
Mg2+ ---| kidney development	1	27838230:1230
ALB ---> kidney blood flow	12	21515181:1185;24160926:1151;24160926:1152;25416657:1019;15111541:1166;15821033:1259;22258233:10081;24240819:10085;23220725:10034;12897085:10;21475099:1;23220725:9;24620819:100;24620819:8;100000536:10260
glucose ---> kidney filtration	4	23010618:1099;22335797:10379;23817135:10078;10753047:10
LDL ---| renal clearance	1	15109771:1225
glucose ---> renin-angiotensin system	1	26632605:10764
Ca2+ ---| renin-angiotensin system	13	18308041:1101;100095274:1180;18456194:1060;25552412:1010;10024322:1038;11739119:1296;20937970:10040;3514053:0;3653966:100;8354166:6;9633025:0;12479242:0;15389290:9
HDL ---| kidney filtration	1	12401888:1268
IgG ---| kidney filtration	1	100382699:1127
LDL --+> kidney function	1	27725544:4
LDL ---| kidney vascularization	1	21119532:10605
glucose ---| renal reabsorption	15	18804100:1001;18804100:1008;21820137:1026;22421598:1007;15331201:1062;15145332:1007;18760680:1100;24560424:1050;19276235:1072;16731998:1050;12538755:1132;12538755:1269;25314300:10052;25014524:10058;4825233:6;19223655:11;26681712:10021
HDL ---| renal clearance	1	15109771:1225
bilirubin --+> kidney tubule function	6	100408253:1108;15561977:1050;15561977:1220;24690955:10032;25049438:10327;23904222:10040;15561977:6;26208389:10234
urea ---| renal clearance	4	20494176:1154;24518388:1145;14602758:1054;21612743:10224
ALB ---> renal vasodilatation	2	20517593:10393;24349249:10126
urea ---> kidney excretion	1	16716621:1009
glucose --+> kidney function	1	28054454:8
ALB --+> renin-angiotensin system	1	27440461:2
Ca2+ ---| glomerular filtration rate	56	20691319:1050;18405718:1095;100145252:1064;15517514:1206;16386516:1033;100206632:1006;100279309:1020;18359409:1050;18359409:1054;12113853:1119;100364540:1241;100367935:1028;25060247:1131;12176568:1081;100515266:1134;12148098:1149;12148098:1151;16352682:1085;16172420:1107;9844161:1256;15238618:1120;11566902:1031;23073059:10018;23073059:10260;23073059:10263;22699285:10098;23823933:10021;23235569:10…
aspartate transaminase ---> kidney function	1	2598397:8
ALB --+> renal tubular secretion	2	9884313:1030;8922736:13
glucose ---> kidney excretion	15	20123087:1012;100285143:1072;14750123:1072;16823474:1124;19114640:1155;18426859:1076;18641203:1214;19158347:1211;23019309:10187;23515311:10064;7789042:3;11835523:8;24130972:2;24067081:7;24067081:10
creatinine ---| renin-angiotensin system	4	22133132:1036;19195602:1019;100566808:1145;23128144:9
Mg2+ ---> kidney blood flow	3	16177005:1191;2435656:2;16100453:0
immunoglobulin ---> kidney excretion	2	20935465:10043;27096762:10063
urea --+> kidney blood flow	1	18037357:1100
immunoglobulin ---| kidney excretion	1	27096762:10063
Mg2+ ---| glomerular filtration rate	5	16177005:1188;16177005:1052;16177005:1058;22966038:11180;100038254:10156;23073059:8;16177005:8;16177005:14;14518698:13
ALB ---> renin-angiotensin system	12	16530121:1102;22749861:1076;25115249:1021;17035613:1170;16107577:1216;22792302:10384;24334637:10170;22088437:10183;24080549:10290;21558957:100;21558957:8;25115249:100;100039022:1007;27440461:2
ALB ---| kidney elimination	3	23639804:1093;27016466:1279;26597252:10109
25(OH)D3 ---> kidney function	1	27676085:10354
bilirubin ---> kidney function	1	26498893:100
bilirubin --+> kidney blood flow	1	20668235:10050
Ca2+ --+> renal reabsorption	7	22414785:1177;16168557:1099;15590208:1028;22366877:10111;21937605:10462;8742959:8;11719848:8
Ca2+ ---> kidney function	47	17659942:1005;20106473:1177;15517514:1208;17692877:1138;19389501:1059;12176568:1012;10543667:1004;17420053:1049;10612418:1044;21914460:1002;18501807:1005;20816334:1115;21146638:1150;100602021:1037;10495131:1105;24423748:1120;18703565:1111;8670043:1645;9844161:1204;21269587:10103;21269587:10115;21546836:10047;22513825:10112;22513825:10252;22513825:10257;22513825:10258;23071773:10109;23343681:10027…
immunoglobulin --+> renal clearance	1	21246276:10055
IgG ---| renal clearance	5	9404876:1006;23743288:1134;17068171:1185;18211902:1254;21246276:10055
HDL ---| kidney excretion	1	7101184:100
Ca2+ ---> kidney filtration	4	21959089:1102;22054238:10926;21784900:10032;2278868:6;21784900:100
immunoglobulin ---> kidney filtration	2	12504092:1122;10508138:1095
ALB ---| renin-angiotensin system	1	27998644:1151
Mg2+ ---> kidney excretion	21	17976367:1002;10751889:1008;10751889:1074;100150882:1044;12234515:1113;11448600:1023;12201536:1091;19103997:1068;11115079:1230;18448590:1291;15001450:1044;12506158:1089;10073595:1132;22068015:10446;453925:5;9050237:6;10958159:1;14634861:1;18582257:2;26750742:1060;100000404:1060;100000543:1073
Mg2+ --+> kidney excretion	3	100000404:1060;100000543:1073;26750742:1060
urea ---> kidney development	1	8587624:100
creatinine ---> glomerular filtration rate	331	18096462:1112;18096462:1164;100002318:1006;100003202:1001;100027310:1014;12559595:1099;17113060:1110;17157286:1005;17208211:1021;19766615:1019;20350654:1004;16165140:1012;21882396:1933;21723445:1933;100129107:1080;100133903:1011;100133903:1023;15755462:1073;14564676:1105;18089366:1038;18261556:1041;21168715:1128;16026817:1010;17572186:1057;19041887:1099;18992617:1075;21704236:1006;17658635:1005;1…
creatinine --+> renal tubular secretion	1	27461168:1113
ALB ---| kidney filtration	20	9092706:1096;19463870:1212;17142175:1076;23000658:1005;22634071:1110;23375682:1063;23735573:1004;24184033:1021;24140611:1109;25958122:1097;15545998:1067;16014576:1046;12473535:1126;22282591:10066;23657852:10937;7420229:6;6717275:4;2653702:5;16014576:2;21329731:0;27630114:16030
triiodothyronine --+> kidney blood flow	1	100036053:10350
ALB ---> kidney excretion	15	10648942:1170;19473832:1154;14706336:1142;15872075:1080;10361854:1051;22452456:10349;21034333:10284;6189360:2;7861773:9;7789042:3;7791101:5;8712223:6;17363599:2;18828129:2;27096762:10063
ALB --+> kidney blood flow	1	100000536:10260
bilirubin --+> glomerular filtration rate	19	100408253:1108;26142826:1009;100868259:1056;10070884:1026;17032942:1135;17032942:1137;15561977:1050;15561977:1220;24009299:10074;24371085:10049;24690955:10032;24677717:10324;23904222:10040;24761005:10363;24761005:10398;7704561:2;10070884:9;15561977:6;18275681:3
Ca2+ ---> kidney blood flow	17	10551681:1147;11566902:1031;17213463:1056;17190906:1061;3514678:0;3655010:1;2450458:5;2831717:8;3052000:3;2548265:100;2240059:0;1306705:6;8282384:8;7516013:100;7898095:4;9156942:0;16446490:3
LDL ---> kidney function	5	8714715:4;9306342:8;26328649:10156;26328649:2;100000438:1061;27725544:4
glucose ---> renal clearance	3	21612743:10224;25250631:10158;7777107:3
LDL ---| glomerular filtration rate	22	16546196:1115;20097344:1081;20097344:1086;19410683:1083;18423813:1073;20621247:1022;21492764:1057;23195014:1058;100748675:1011;25526878:1011;18492490:1103;100285062:1101;14655182:1101;25708553:1159;22290079:10062;22931970:10293;25396414:10008;25396414:10081;25073588:10196;23204248:10170;20113268:11;25396414:8;25367276:100;20097344:100;24458801:3
creatinine ---| renal clearance	12	12697375:1102;9580760:1096;100442845:1109;22108572:1109;26119486:1035;18577565:1060;11733540:1168;11733540:1383;20567810:10362;11186701:8;100516275:1081;17200156:1138;21270793:10009
glucose ---> kidney development	4	23302714:10027;23152292:10864;24226524:10752;23936866:10
HDL ---| glomerular filtration rate	19	21835280:1035;22037512:1040;23489551:1050;23489551:1055;26145254:1046;26145254:1062;26145254:1114;25708553:1056;24529154:1067;12427147:1037;22290079:10062;22879436:10157;24223189:10176;24380094:10146;100055986:10088;25856231:10606;24345987:10045;18949085:5;24223189:12;24529154:4;24668104:6;24853998:7;26337134:1136;25022529:10109
aspartate transaminase ---> glomerular filtration rate	1	26039951:6
Mg2+ ---> kidney function	17	15919495:1076;18796350:1088;23891286:1075;100696838:1008;23870376:1118;24423748:1120;19656910:1240;24732082:10199;1887528:4;8157853:10;9926976:7;11866106:2;15083564:7;15919495:11;22926331:100;26780281:10176;27258403:10379;27387046:10206
Ca2+ ---| renal reabsorption	1	27045726:10023
ALB ---> kidney tubule function	2	6707203:7;16841664:5
HDL ---| renin-angiotensin system	2	25218762:1076;23378623:10082
IgG ---| kidney excretion	5	100495744:1082;22227322:1082;1750542:5;11479148:5;11921700:7
Ca2+ --+> kidney elimination	1	22759781:10478
glucose ---| renal vasodilatation	1	20546780:1182
glucose ---> glomerular filtration rate	54	12714122:1029;18187215:1069;16125272:1097;16125272:1098;100377614:1087;100377614:1089;21536229:1106;23062982:1059;23489551:1055;25104103:1032;25935863:1059;25659911:1167;16332993:1143;10082486:1109;18256360:1134;12761248:1193;10642340:1120;9931165:1129;9893112:1880;21911775:10036;23302714:10411;20595688:10116;24781861:10038;24781861:10079;24983394:10144;25741695:10073;22357918:10200;23152292:1072…
ALB ---| kidney function	1	27848268:4
creatinine ---> kidney blood flow	6	17765040:1041;19805915:1172;21909828:10118;100065723:10102;21169816:6;27427971:10240
urea ---> kidney function	1	27866048:1013
IgG ---| kidney function	1	27108805:1041
urea --+> renal reabsorption	2	100000359:1083;28087157:1083
25(OH)D3 ---| renin-angiotensin system	1	22718888:10423
glucose --+> kidney blood flow	8	16186399:1052;9893112:1853;10446946:1198;22054347:10153;3882500:100;2190466:3;8359579:100;19073906:100
Ca2+ ---| kidney excretion	1	26870965:10570
Ca2+ ---> renal water reabsorption	1	15536171:1054
Ca2+ ---> kidney tubule function	6	100377061:1011;10356089:1021;23921566:10044;23917029:10003;3896504:3;9459372:8;10356089:1;23917029:0
LDL ---| kidney excretion	2	10412754:7;10882184:100
creatinine ---> kidney tubule function	3	23414827:1210;15128879:10;27245055:4
IgG ---> glomerular filtration rate	3	19168555:1060;19168555:11;2039248:8;100043662:1008
aspartate transaminase ---> renal clearance	1	24389434:10225
ALB ---> glomerular filtration rate	68	18657657:1002;18803949:1007;18803949:1075;19070384:1062;100285067:1082;100285067:1083;15983955:1068;21146270:1091;21146270:1105;22192665:1113;17355105:1055;100450059:1085;100488140:1149;100566970:1086;23429046:1114;23182925:1051;23429046:1113;23727169:1053;14655188:1082;14655188:1083;25975964:1077;18849087:1087;17954285:1100;100659651:1060;100790182:1065;25468311:1065;19168555:1060;12446500:1063;…
Mg2+ ---> renal reabsorption	3	12537991:1165;22496496:10203;3817655:4
immunoglobulin ---> glomerular filtration rate	3	2005583:1;7753269:0
HDL ---> kidney function	11	100286158:1182;16084284:1033;20621255:1107;19217521:1015;20110571:1067;12819243:1047;23358876:10188;24796787:10211;12819243:4;25467845:1;100000010:1084;100000352:1086
immunoglobulin ---> kidney function	14	19010241:1035;15609263:1045;15609263:1175;15866698:1073;18774632:1059;16310562:1011;23886236:1005;25769580:1085;25870941:1125;11532096:1128;22505747:10024;21954446:10445;18525007:11;19224250:7;22559275:5
IgG ---> kidney function	4	19129256:1261;22252844:10024;324484:1;27108805:1041
urea ---> glomerular filtration rate	37	21763304:1114;100133903:1023;100408249:1135;100408249:1205;100494438:1162;100542201:1012;24220764:1052;25064377:1014;26003607:1031;25640527:1153;100044838:1174;10676731:1027;100655831:1034;23871366:1167;23871366:1168;100877431:1021;12446500:1063;8941641:1132;10744621:1087;12909709:1110;11441026:1173;16849692:1275;8989270:1151;23037160:10036;22456603:10190;23526187:10233;23028946:10103;24231664:10…
